# 1 **Genomic epidemiology of SARS-CoV-2 within households in coastal** 2 **Kenya: a case ascertained cohort study**

## 3 4 **Authors**

5 Charles N. Agoti<sup>1,2,\*</sup>, Katherine E. Gallagher<sup>1,3</sup>, Joyce Nyiro<sup>1</sup>, Arnold W. Lambisia<sup>1</sup>,  
6 Nickson Murunga<sup>1</sup>, Khadija Said Mohammed<sup>1</sup>, Leonard Ndwiga<sup>1</sup>, John M. Morobe<sup>1</sup>,  
7 Maureen W. Mburu<sup>1</sup>, Edidah M. Ongera<sup>1</sup>, Timothy O. Makori<sup>1</sup>, My V.T. Phan<sup>4</sup>, Matthew  
8 Cotten<sup>4,5</sup>, Lynette Isabella Ochola-Oyier<sup>1</sup>, Simon Dellicour<sup>6,7</sup>, Philip Bejon<sup>1,8</sup>, George  
9 Githinji<sup>1,2</sup>, and D. James Nokes<sup>1,9</sup>

## 10 11 **Affiliations**

12 <sup>1</sup> Kenya Medical Research Institute (KEMRI)-Wellcome Trust Research Programme  
13 (KWTRP), Kilifi, Kenya

14 <sup>2</sup> Pwani University, Kilifi, Kenya

15 <sup>3</sup> London School of Hygiene & Tropical Medicine, United Kingdom

16 <sup>4</sup> MRC/UVRI & London School of Hygiene and Tropical Medicine, Entebbe, Uganda.

17 <sup>5</sup> MRC-University of Glasgow, Centre for Virus Research Glasgow, United Kingdom

18 <sup>6</sup> Spatial Epidemiology Lab (SpELL), Université Libre de Bruxelles, Bruxelles, Belgium

19 <sup>7</sup> Department of Microbiology, Immunology and Transplantation, Rega Institute,  
20 Laboratory for Clinical and Epidemiological Virology, KU Leuven, University of Leuven,  
21 Leuven, Belgium

22 <sup>8</sup> Nuffield Department of Medicine, University of Oxford, Oxford, United Kingdom

23 <sup>9</sup> School of Life Sciences and Zeeman Institute for Systems Biology and Infectious  
24 Disease Epidemiology Research (SBIDER), University of Warwick, Coventry, United  
25 Kingdom

## 26 27 **\* Correspondence**

28 Dr Charles N. Agoti,  
29 Epidemiology and Demography Department,  
30 KEMRI-Wellcome Trust Research Programme,  
31 P.O. Box 230, Kilifi – 80108,

32 Kenya.

33 Email: [cnyaigoti@kemri-wellcome.org](mailto:cnyaigoti@kemri-wellcome.org)

34

35 **Article type**

36 Research Article

37

38 **Key words**

39 SARS-CoV-2, COVID-19, household, transmission, genomics, Kenya

40 **Abstract (221 words)**

41 Analysis of severe acute respiratory syndrome coronavirus 2 (SARS-CoV-2) genomic  
42 sequences from household infections may provide useful epidemiological information  
43 for future control measures. Between December 2020 and July 2022, we conducted a  
44 case-ascertained household cohort study whereby households were recruited if a  
45 member was either a SARS-CoV-2 case or contact of a confirmed case. A total of 765  
46 members of 214 households were prospectively monitored for SARS-CoV-2 infection  
47 and transmission. Follow-up visits collected a nasopharyngeal/oropharyngeal (NP/OP)  
48 swab on days 1, 4 and 7 for RT-PCR diagnosis. If any of these were positive, further  
49 swabs were collected on days 10, 14, 21 and 28. Of 2,780 NP/OP swabs collected, 540  
50 (19.4%) tested SARS-CoV-2 positive and viral genome sequences were recovered for  
51 288 (53.3%) positive samples. The genomes belonged to 23 different Pango lineages.  
52 Phylogenetic analysis including contemporaneous Coastal Kenya data estimated 233  
53 putative transmission events involving 162 members of the 89 households, of which 60  
54 (25%) were intra-household transmission events while 173 (75%) were infections that  
55 likely occurred outside the households. In 34 (38%) households, multiple virus  
56 introductions were observed (up to six) within the one-month follow-up period, in  
57 contrast to high-income settings, where a single introduction seemed to occur during  
58 epidemic waves. Our findings suggests that in this setting control of respiratory virus  
59 spread by household member isolation will be ineffective.

## 60 **Introduction**

61 Households are a fundamental unit of social structure and the frequent scene of  
62 respiratory pathogen transmission including for severe acute respiratory syndrome  
63 coronavirus 2 (SARS-CoV-2), the aetiological agent of coronavirus disease 2019  
64 (COVID-19) <sup>1,2</sup>. The household secondary attack rate (i.e., the probability of infection of  
65 susceptible household members directly from the first case in the household) for SARS-  
66 CoV-2 has been estimated to be about 21.1% (95%CI: 17.4-24.8%) with considerable  
67 heterogeneity observed over geographic regions and time periods <sup>3-6</sup>. An improved  
68 understanding of SARS-CoV-2 household transmission, including the frequency of virus  
69 transmission within a household compared to transmission from outside into the  
70 household, may help refine local control measures.

71  
72 As of August 2022, Kenya had experienced six waves of SARS-CoV-2 infections <sup>7</sup>. In  
73 this period, Kenya's COVID-19 countermeasures as measured by the Oxford Stringency  
74 Index (SI), a measure based on nine key indicators rescaled from 0-100, fluctuated  
75 between 36 and 89<sup>8</sup> in response to the perceived threat. The different infection waves  
76 were dominated by distinct virus variants: the first two by the early ancestral virus  
77 lineage (mainly B.1), the third by the Alpha (B.1.1.7) variant of concern (VOC), the  
78 fourth by Delta VOC (B.1.617.2), the fifth by Omicron VOC (BA.1), and the sixth by  
79 Omicron sub-variants BA.4/5 <sup>9</sup>. Local epidemiological studies suggest many SARS-  
80 CoV-2 infections have been asymptomatic or mild <sup>10</sup>, as evidenced by the high  
81 seroprevalence (48.5% by March 2021 <sup>11</sup>) without high numbers of hospitalisations or  
82 excess mortality <sup>12</sup>. However, confirmed active SARS-CoV-2 infections by the Kenyan  
83 Ministry of Health (MoH) have been reported in less than 1% of the Kenyan population  
84 indicating inadequate testing. Consequently, gaps exist in our quantitative  
85 documentation of SARS-CoV-2 circulation within the Kenyan population.

86  
87 To date, SARS-CoV-2 genomic analysis has played a key role in elucidating COVID-19  
88 pandemic transmission patterns <sup>13-17</sup>. For instance, genomic analysis has helped  
89 uncover the nature of virus seeding into close living environments like, hospitals <sup>18,19</sup>,  
90 prisons<sup>20</sup>, cruise ships <sup>21</sup>, long-term care facilities <sup>22</sup>, or learning institutions <sup>23</sup>, and has

91 also uncovered a number of superspreading events<sup>19,24</sup>. Unlike many RNA viruses,  
92 SARS-CoV-2 replication is believed to be under some level of proof-reading<sup>25</sup>, limiting  
93 its substitution rate (estimated at  $9.90 \times 10^{-4}$  nucleotide substitutions/site/year)<sup>26</sup>, a  
94 parameter critical in applying genomics to understand short-term epidemiological  
95 dynamics.

96  
97 Few studies have examined SARS-CoV-2 genomic diversity in putative within-  
98 household transmission cases. In Ireland, Hare *et al*<sup>27</sup> found that most family members  
99 testing positive had indistinguishable consensus genome sequences from other family  
100 members and the early presumed index case had a divergent sub-lineage. In the  
101 present study, we document SARS-CoV-2 transmission patterns within households in  
102 coastal Kenya by analysing infections identified in a case-ascertained cohort (i.e.  
103 households enrolled if a member was confirmed case of SARS-CoV-2 or a contact of  
104 one) during successive local waves of infections<sup>28</sup>. We undertook detailed genomic  
105 analyses to identify patterns of SARS-CoV-2 introductions into households and to  
106 document the frequency and patterns of infection spread within households in coastal  
107 Kenya.

108

## 109 **Results**

### 110 **Baseline characteristics**

111 A total of 765 participants from 214 households were recruited between 10<sup>th</sup> December  
112 2020 and 29<sup>th</sup> July 2022. From these, 2,780 nasopharyngeal/oropharyngeal (NP/OP)  
113 swabs were collected, 540 (19.4%) of which tested SARS-CoV-2 positive by RT-PCR  
114 (**Table 1**). The positive swabs were from 254 infected participants in 119 households.  
115 The temporal distribution of the swab collections for all the 214 households and their  
116 RT-PCR testing results are shown in **S1 Fig**. The participants with a positive swab had  
117 a median age of 27 years (IQR: 12.0-46.0; **Table 1**), with 164 (64.6%) females.  
118 Compared to participants who remained SARS-CoV-2 negative during the follow-up  
119 period, positive cases were more likely to report at least one acute respiratory illness  
120 (ARI) symptom (67.7% vs 32.5%;  $p < 0.001$ , chi-squared test). The household  
121 recruitments were predominantly coincidental with the national COVID-19 waves 3, 4, 5

122 and 6 (**Fig. 1A and B**) with only one household recruited during wave 2. The changes in  
123 the national countermeasures during the study period as estimated by the Oxford SI is  
124 provided in **Fig. 1C**.

125

126 **Table 1. Demographic characteristics of study participants.**

| <b>Characteristic</b>           | <b>Positive</b>  | <b>Negative</b>  | <b>Total</b>     |
|---------------------------------|------------------|------------------|------------------|
| <b>NP/OP swabs</b>              | 540              | 2240             | 2780             |
| <b>Recruited households</b>     | 119              | 95               | 214              |
| <b>Recruited participants</b>   | 254              | 511              | 765              |
| <b>Sex</b>                      |                  |                  |                  |
| female (%)                      | 164 (64.6)       | 297 (58.1)       | 461 (60.3)       |
| male (%)                        | 90 (35.4)        | 214 (41.9)       | 304 (39.7)       |
| <b>Age distribution (years)</b> |                  |                  |                  |
| <b>Median (IQR)</b>             | 27.0 (12.0-46.0) | 20.0 (10.0-40.0) | 24.0 (11.0-44.0) |
| <b>Age categories</b>           |                  |                  |                  |
| <b>0-4 y (%)</b>                | 31 (12.2)        | 54 (10.6)        | 85 (11.1)        |
| <b>5-9 y (%)</b>                | 23 (9.1)         | 54 (10.6)        | 77 (10.1)        |
| <b>10-19 y (%)</b>              | 48 (18.9)        | 133 (26.0)       | 181 (23.7)       |
| <b>20-39 y (%)</b>              | 73 (28.7)        | 113 (28.6)       | 219 (28.6)       |
| <b>40-64 y (%)</b>              | 63 (24.8)        | 92 (18.0)        | 155 (20.3)       |
| <b>65+ y (%)</b>                | 14 (5.5)         | 31 (6.1)         | 45 (5.9)         |
| <b>Unknown</b>                  | 2 (0.8)          | 1 (0.2)          | 3 (0.4)          |
| <b>Symptom status</b>           |                  |                  |                  |
| <b>asymptomatic</b>             | 82 (32.3)        | 345 (67.5)       | 427 (55.8)       |
| <b>symptomatic</b>              | 172 (67.7)       | 166 (32.5)       | 338 (44.2)       |

127 IQR: Interquartile Range, y: years

128

129

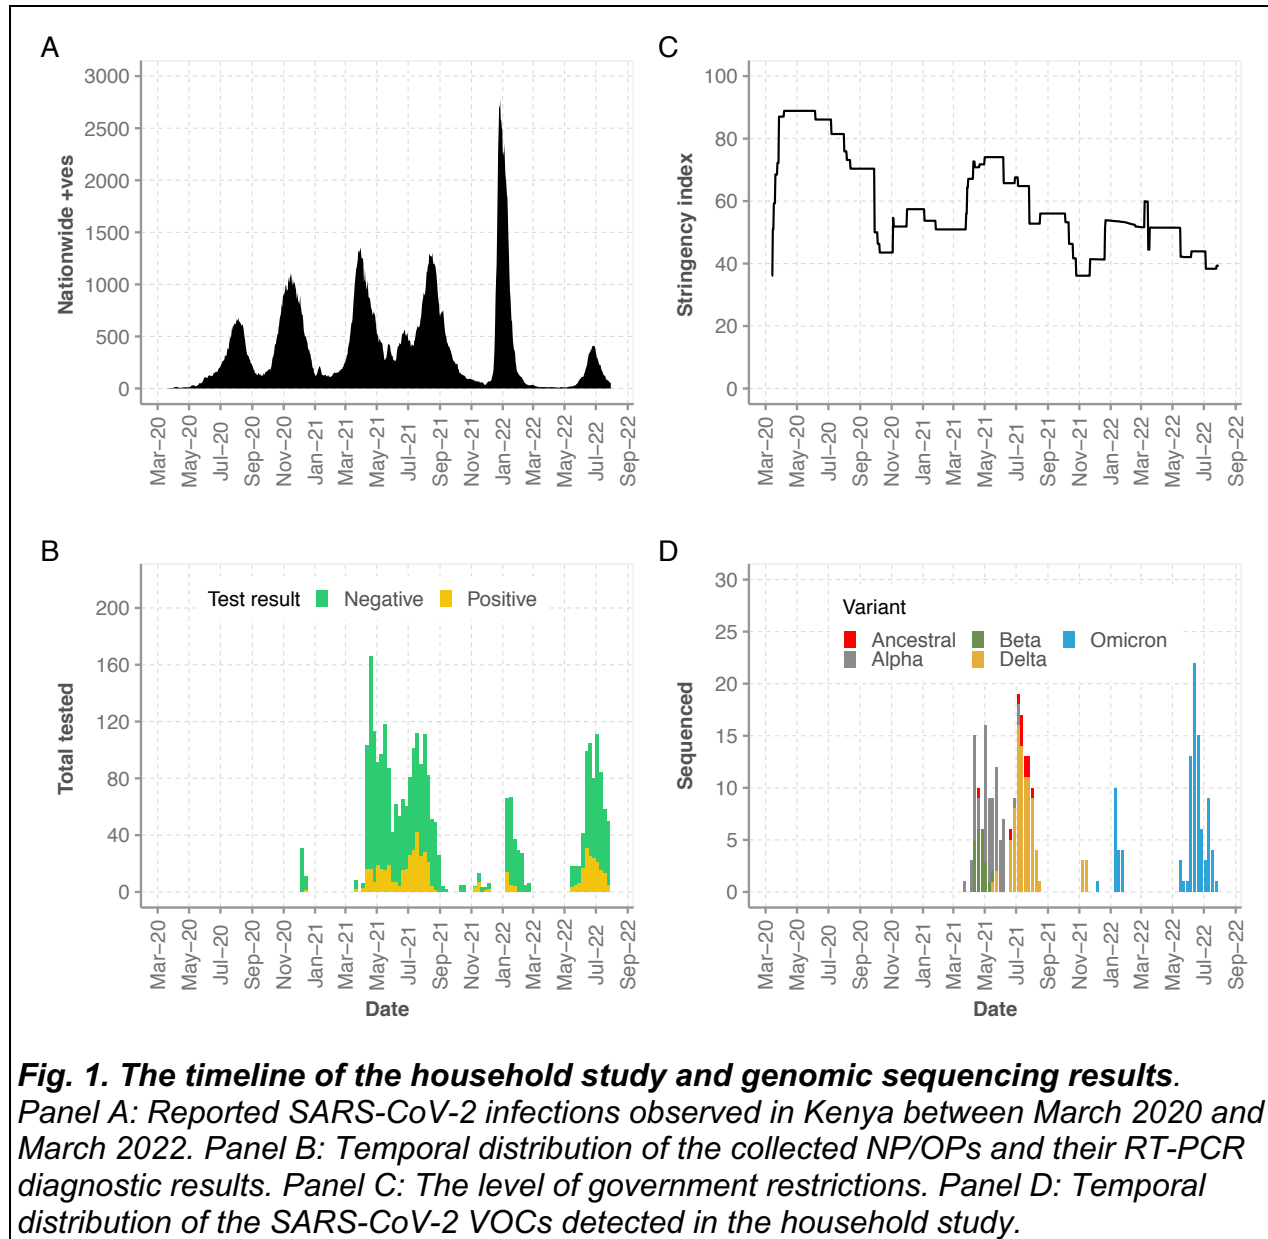

130

131 **Fig. 1. The timeline of the household study and genomic sequencing results.**  
132 *Panel A: Reported SARS-CoV-2 infections observed in Kenya between March 2020 and*  
133 *March 2022. Panel B: Temporal distribution of the collected NP/OPs and their RT-PCR*  
134 *diagnostic results. Panel C: The level of government restrictions. Panel D: Temporal*  
135 *distribution of the SARS-CoV-2 VOCs detected in the household study.*

136

137

138

### 139 **Genomic sequencing and lineage/VOC classification**

140 Near complete genomes (over 80% coverage) were obtained from 288 samples (53.3%  
141 of positive samples) collected from 162 participants from 89 households. The samples  
142 that failed sequencing (n = 252) had high Ct values (corresponding to low viral load;  
143 >33.0; **S2. Fig.**) or yielded low quality PCR products during library preparation. The 288  
144 genomes were classified into non-VOC (Pango lineage B.1; n = 11), Alpha VOC (n =  
145 70), Beta VOC (n = 22), Delta VOC (n = 88) and Omicron VOC (n = 97; **Fig.1D**). All  
146 Alpha and Beta sequences fell within lineage B.1.1.7 and B.1.351, respectively. Within  
147 the Delta VOC, six Pango lineages were identified while within the Omicron VOC 14  
148 Pango lineages were identified. The lineages within Omicron VOC included those that  
149 classified under BA.1, BA.2, BA.4 and BA.5 sub-variants. A summary of the temporal  
150 distribution of the 23 Pango lineages that were identified across the sequenced cases  
151 and their history of global detection is presented in **S2 Fig. and S1 Table**.

152

### 153 **Phylogenetic clustering of the household study genomes**

154 To investigate the genetic diversity in the household study genome sequences, we  
155 reconstructed a maximum likelihood (ML) phylogeny that included background coastal  
156 Kenya co-circulating viruses (n = 2,555). As expected, the household genome  
157 sequences clustered by VOC and Pango lineages with other Kenyan coastal sequences  
158 (**S3 Fig.**). Notably, lineage B.1 sequences were found in multiple branches of the  
159 phylogeny, including some at the base of branches leading to Beta and Delta VOCs. To  
160 assess the genetic relatedness of the recovered genomes within and between  
161 households, we reconstructed VOC-specific phylogenies with tips coloured by the  
162 household of sampling (**Fig. 2**). Here we observed both intra- and inter-household  
163 clustering (i.e., multiple sequences of a single clade identified in one household or  
164 shared between two or more households). In a few households, sequences of a single  
165 VOC but distinct clades were observed, indicating multiple distinct virus introductions  
166 into the same household (**Fig. 2**).

167



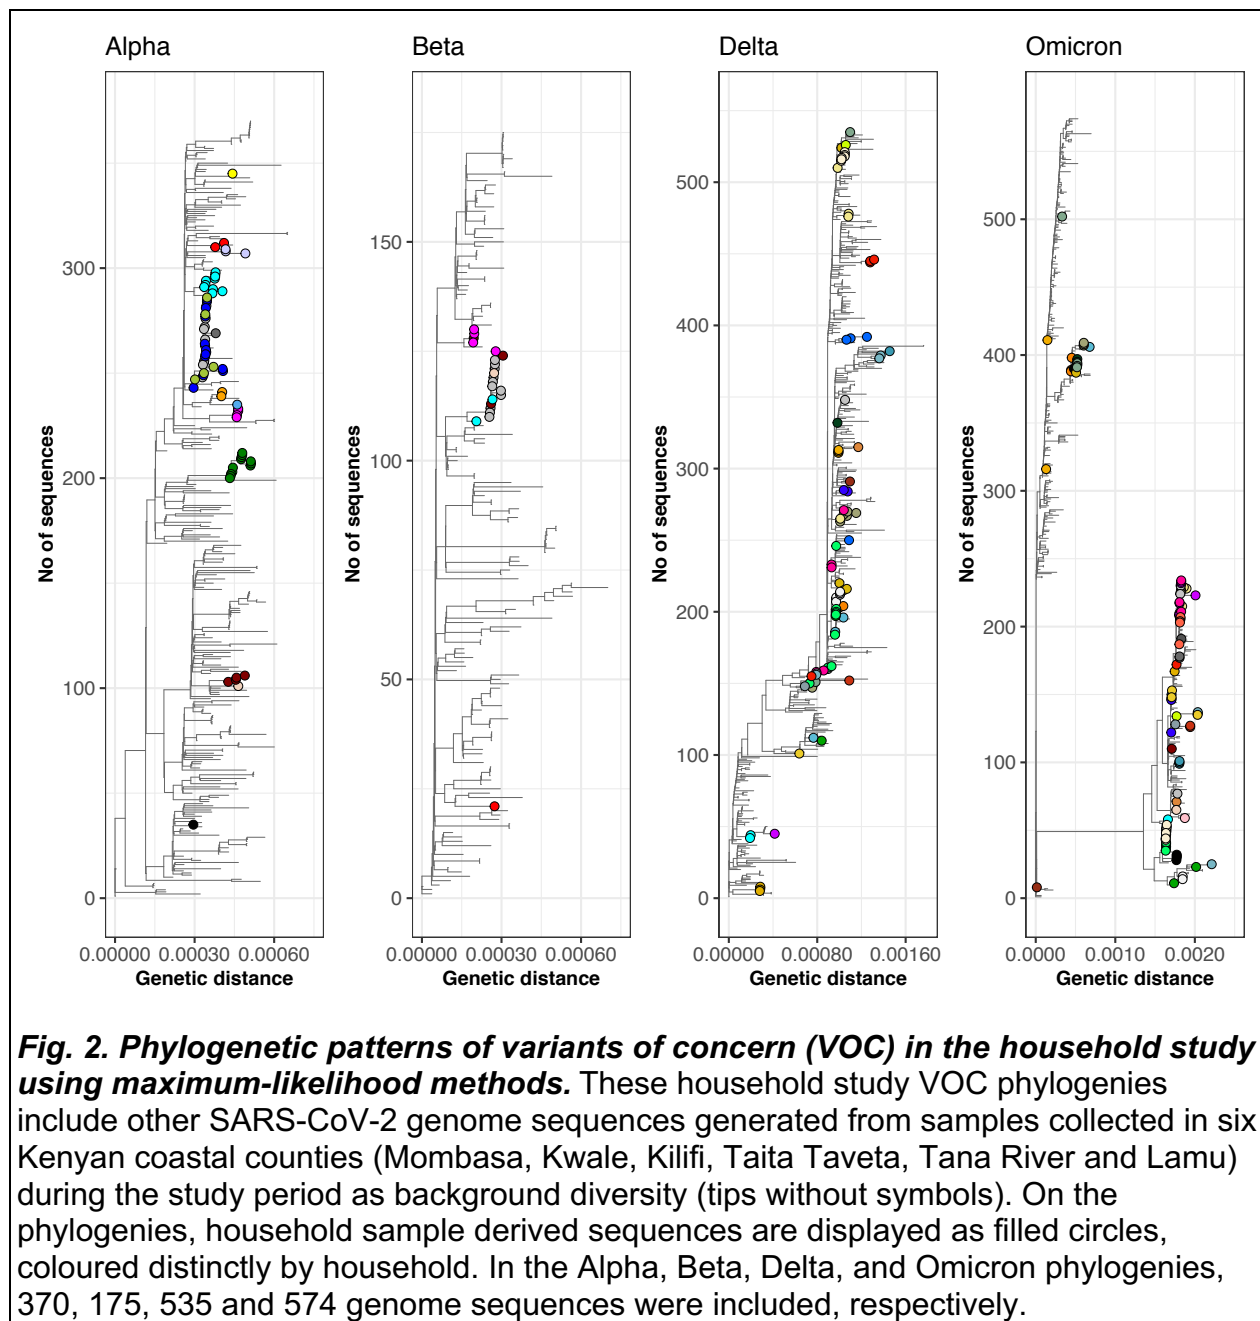

168

169 **Fig. 2. Phylogenetic patterns of variants of concern (VOC) in the household study**  
170 **using maximum-likelihood methods.** These household study VOC phylogenies  
171 include other SARS-CoV-2 genome sequences generated from samples collected in six  
172 Kenyan coastal counties (Mombasa, Kwale, Kilifi, Taita Taveta, Tana River and Lamu)  
173 during the study period as background diversity (tips without symbols). On the  
174 phylogenies, household sample derived sequences are displayed as filled circles,  
175 coloured distinctly by household. In the Alpha, Beta, Delta, and Omicron phylogenies,  
176 370, 175, 535 and 574 genome sequences were included, respectively.

177

### 178 **Estimating the number of introductions into the households**

179 SARS-CoV-2 has been reported to have a genomic evolutionary rate of ~2 nucleotide  
180 substitutions per genome per month<sup>29</sup>. A heterogenous distribution of the pairwise  
181 nucleotide differences of specimens identified in the same household was observed  
182 (range 0-63; median 0.0, mean 2.8; **S4 Fig.**). More than two nucleotide differences  
183 between genomes from the same household were observed in 25 households, implying

184 possible multiple introductions into these households. We further investigated the  
185 number of virus introductions into each household using ancestral state reconstruction  
186 (ASR) along the dated ML phylogeny<sup>16,30</sup>. A total of 155 virus introductions were  
187 predicted into the 89 households where we recovered SARS-CoV-2 sequence data. On  
188 classifying the transition events by sequence origin ("non-household" events - those  
189 individuals not from same household - and "household" events - those where both  
190 involved individuals were members of same household), we found that most transitions  
191 were "non-household" compared to "household" transition events (75% vs. 25%; **Fig.**  
192 **3A**). Overall, we estimated that a single virus introduction occurred for 55 households  
193 (61%), two introductions for 16 households (17%), three introductions for nine  
194 households (10%), four introductions for five households (6%), five introductions for  
195 three households (3%) and six introductions in one household (**Fig. 3B**).  
196

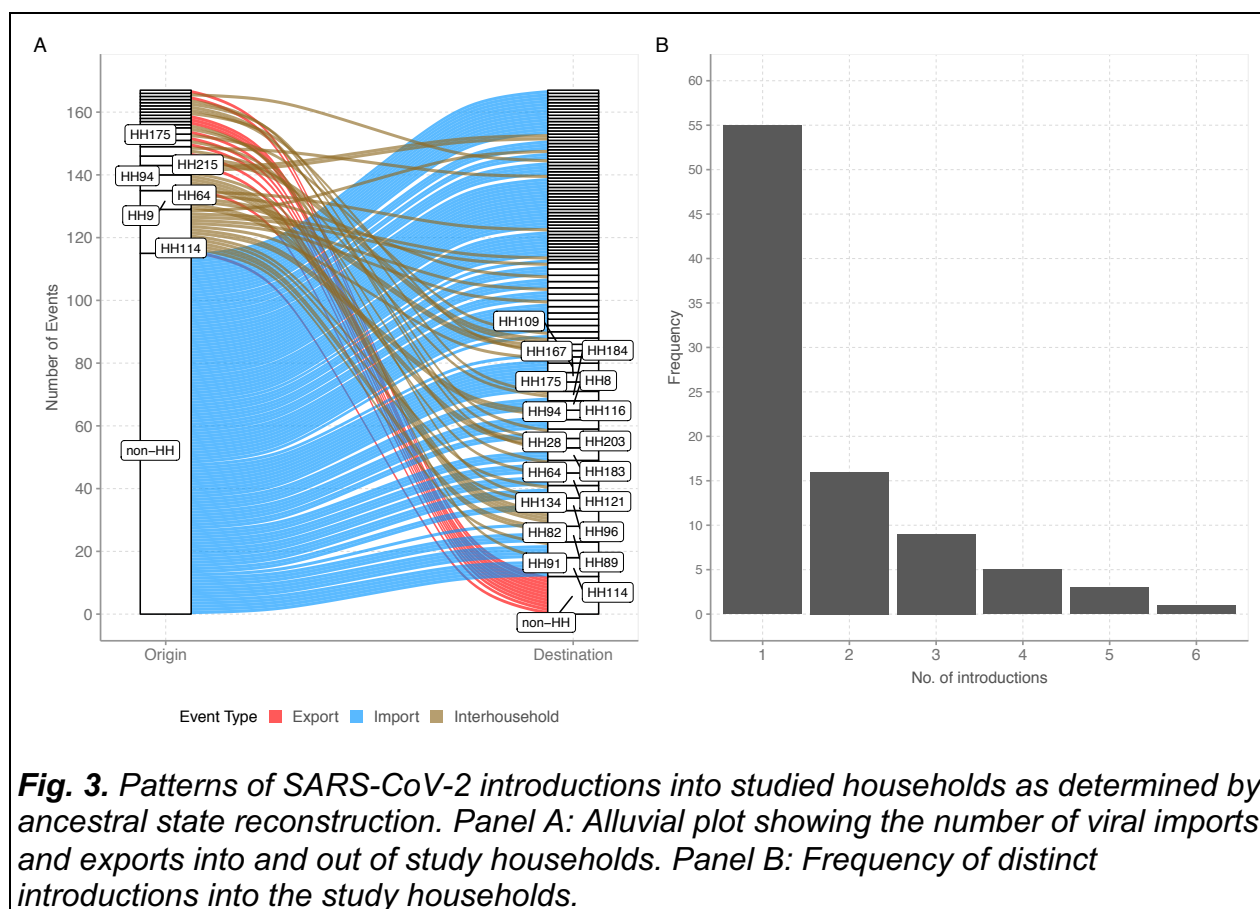

197  
198  
199  
200  
201  
202

## 203 Discussion

204 We provide evidence of frequent multiple introductions of SARS-CoV-2 into rural coastal  
205 Kenyan households within a month, a finding that was unexpected. The conventional  
206 view has been that households with concurrently infected members most likely acquire  
207 the infection introduced through a single index case. This assumption has been  
208 repeatedly supported by several genomic studies. For instance, a phylogenetic analysis  
209 performed in a Dutch study following 85 households showed a single introduction into  
210 all the studied households <sup>4</sup>. By contrast, in the present study, about one-third of  
211 infected households (38%) had two or more introduction events within a distinct  
212 epidemic wave.

213  
214 A variety of factors may explain the differences in household SARS-CoV-2 introduction  
215 patterns identified in our study compared to previous observations. First, in our setting,  
216 multiple families may live in one compound and eat from one kitchen and these were  
217 defined as a single household in this study <sup>31</sup>. Such living arrangement results in  
218 relatively larger household sizes that may be associated with higher chances of multiple  
219 virus introductions, especially at the peak of epidemic waves. Second, the dominance  
220 of informal sector jobs in this setting may have made options like working from home  
221 difficult to implement. As result the potential for acquiring infection outside the  
222 household setting was high relative to high-income settings.

223  
224 Our study followed-up participants for a period of up to 1 month with serial sample  
225 collection and recovered genomes were analysed in the context of contemporaneous  
226 locally circulating diversity in coastal Kenya <sup>32</sup>. Despite observing minimal nucleotide  
227 variation between samples from members of the same household infection clusters,  
228 when we incorporated sampling dates through the ASR analysis, we were able to  
229 partially reconstruct potential within-household transmission events. This allowed the  
230 identification of multiple introductions into the households of closely related viruses,  
231 observation of putative within-household transmission and short-interval reinfections.

232

233 Few studies have examined SARS-CoV-2 household transmission dynamics within  
234 Africa<sup>33-35</sup>, and these have resulted in diverse findings. In rural Egypt, a 6-month study  
235 reported a SAR of 89.8%<sup>33</sup>, in South Africa a 13-month study reported a 25% infection  
236 rate among vulnerable household contacts<sup>34</sup>, and in Madagascar, a SAR of 38.8%  
237 (CI:19.5-57.2)<sup>36</sup> was reported. None of these studies included a viral genomic analysis  
238 to support any conclusions that the inferred household transmission clusters were  
239 epidemiologically linked and arose from a single index case.

240  
241 The Kenyan government countermeasures in place during the study period may have  
242 had an impact on the spread of SARS-CoV-2 within the study households. In June  
243 2020, the Kenyan government announced guidelines for home-based care for  
244 asymptomatic or mildly symptomatic patients without co-morbidities<sup>37</sup>. Kenya started  
245 vaccinating its population in March 2021, but the coverage was low (<15%) during the  
246 study period<sup>38</sup>, and thus it is unlikely that it affected transmission during our study. The  
247 stringency index in the country during the study period fluctuated from 35% to 75%.  
248 However, we did not detect variation in the pattern of introductions over time, which  
249 could suggest that the various restrictions had minimal impact at the household level.  
250 However, concluding on this would likely require more advanced epidemiological  
251 modelling.

252  
253 This study had several limitations. First, several positive NP/OP samples (46.7%) failed  
254 to yield viral genome sequences or had large genome sequencing gaps due to PCR  
255 amplicon drop-off. With such a high level of genome data missingness, the overall  
256 phylogenetic signal was reduced in trying to establish who infected whom or  
257 directionality of transmission. Second, we cannot rule out that a few of the sequence  
258 changes observed could be sequencing or assembly artifacts<sup>39</sup>. Third, the case-  
259 ascertained study design we used had the drawback that by the time the first sample  
260 was collected, multiple positive cases had already occurred in most households. Most of  
261 the index cases were recruited following presentation to a health facility with ARI. This  
262 complicated our effort of fully determining who infected whom back in the household. To  
263 overcome this challenge, future studies should observe members before entry of the

264 virus into households and genomic data co-analysed with other relevant epidemiological  
265 data <sup>40</sup>. Fourth, our sampling interval, especially after week two, may have missed  
266 persons who had been positive for less than the 7 days sample collection interval.  
267 Higher density sampling has previously been associated with a higher attack rate<sup>4</sup>.  
268 Finally, we did not bring in other datatypes like, contact patterns, symptoms and shared  
269 intra-host variation <sup>41</sup>, which would have provided further insights into potential  
270 transmission linkages. An analysis of secondary attack rates is being conducted that  
271 includes all data, including serological evidence of infection, which is not included here.

272  
273 In conclusion, we identified an unusually high number of independent virus introductions  
274 into households in coastal Kenya during household temporally clustered infections. Our  
275 findings suggests that control of SARS-CoV-2 transmission by household member  
276 isolation alone may not stop community transmission in this setting. Our study further  
277 highlights the importance of examining genomic data for accurate estimation and  
278 interpretation of SARS-CoV-2 household epidemiological parameters.

279

## 280 **Methods**

### 281 **Study design and recruitment**

282 We conducted a case-ascertained study in coastal Kenya, where new households were  
283 recruited into the study via five local health facilities or the Kilifi County Department of  
284 Health rapid response team (RRTs). Households were defined as dwellings or groups of  
285 dwellings that share the same kitchen or cooking space (**S2 Table**). Many of the  
286 recruited households were from within the Kilifi Health and Demographic Surveillance  
287 System (KHDSS) area located in Kilifi County, Coastal Kenya <sup>42</sup>. To get enrolled, a  
288 household needed to have at least two occupants, to be accessible by road, and to  
289 obtain permission from the household head. In the beginning, only households with a  
290 member who was a contact of a confirmed case from a different household were  
291 recruited, but due to slow enrolment, we revised the protocol to include households with  
292 confirmed cases at first sampling. A household was exempted if at the time of  
293 recruitment: two or more members had already developed COVID-19 symptoms (e.g.

294 fever, sore throat, cough etc), a member had been hospitalized due to COVID-19, or the  
295 household had been enrolled in a trial of therapeutic COVID-19 product.

296

## 297 **Follow-up**

298 During each household visit, a NP/OP swab was obtained from all participants and  
299 transported in cool boxes with ice packs to KEMRI-Wellcome Trust Research  
300 Programme (KWTRP) laboratories within 48 hr for real-time RT-PCR testing. The study  
301 had broadly two follow-up arms: "reduced follow-up" and "intense follow-up".

302 Households in the "reduced follow-up" arm were those where all the members tested  
303 SARS-CoV-2 negative at day 1, 4, and 7. Therefore, in that case, follow-up was  
304 discontinued henceforth with a few exceptions (**S1 Fig.**). The "intense follow-up arm"  
305 was activated when a household member tested positive on day 1, 4, or 7. In that case,  
306 the household was sampled again on day 10, 14, 21, and 28. Data on baseline  
307 household and demographic characteristics were collected by the study team at  
308 enrolment. During all households' visits, data on presence of ARI symptoms (e.g., fever,  
309 cough, runny nose, sore throat, headache) were collected.

310

## 311 **Laboratory procedures**

### 312 *SARS-CoV-2 diagnosis*

313 SARS-CoV-2 testing of study samples was undertaken alongside samples collected in  
314 six coastal counties of Kenya as part of the national COVID-19 testing as previously  
315 described<sup>10</sup>. Four different viral RNA extraction kits (namely, QIAamp Viral RNA Mini  
316 Kit, RNeasy® QIAcube® HT Kit, TIANamp Virus RNA Kit and Da An Gene Nucleic  
317 acid Isolation and Purification Kit) were deployed in combination with five different RT-  
318 PCR kits/protocol (namely, Da An Gene Co. detection Kit, European Virus Archive-  
319 Global (EVAg) E gene protocol, Standard M Kit, Sansure Biotech Novel Coronavirus  
320 (2019-nCoV) Nucleic Acid Diagnostic Real-time RT-PCR kit<sup>10</sup>). Positives were  
321 determined using the kit/protocol-defined cycle thresholds (Ct). In kits where multiple  
322 SARS-CoV-2 genomic regions were targeted, the average cycle threshold (Ct) was  
323 calculated from the individual Cts.

324

325 *Genome sequencing*

326 We aimed to sequence whole genomes of all the RT-PCR positive samples with a cycle  
327 threshold of < 33.0. Viral RNA was re-extracted from the specimens using QIAamp viral  
328 RNA mini-Kit following the manufacturer's instructions and converted to cDNA using  
329 Lunascript kit with ARTIC protocol primers<sup>43</sup>. Genome amplification was conducted  
330 using Q5 PCR kit and ARTIC protocol primers (initially v3 and then v4). Sequencing  
331 libraries were prepared using Oxford Nanopore Technologies (ONT) ligation sequencing  
332 kit SQK-LSK109 and the ONT Native Barcoding Expansion kit as described in the  
333 ARTIC protocol<sup>43</sup>. Sequencing was performed on Oxford Nanopore Technologies'  
334 MinION or GridION devices using R9.4.1 flow cells.

335

336 **Bioinformatic analysis**

337 *Genome assembly and lineage assignment*

338 The ONT's raw sequencing reads (FAST5) were base-called and demultiplexed using  
339 ONT's Guppy v3.5-4.2. The resultant files (FASTQ) were assembled into consensus  
340 genomes using ARTIC bioinformatic pipeline reference-based approach  
341 (<https://artic.network/ncov-2019/ncov2019-bioinformatics-sop.html>; last accessed 2022-  
342 09-17). Only nucleotides with a read depth of more than  $\times 20$  were included into the  
343 consensus sequence. Only sequences with >80% genome coverage were further  
344 analysed. The genomes were assigned Pango lineages using the command-line  
345 installation of pangolin v4.1.3, PUSHER-v1.3, scorpio v0.3.16 and constellation v0.1.6  
346 <sup>44,45</sup>.

347

348 *Phylogenetic analysis*

349 Multiple sequence alignments were generated using Nextalign v.1.10.1 referenced-  
350 based aligner within the Nextclade tool v0.14.2<sup>46</sup> using the command:

351

352 *nextalign -r NC\_045512.fasta -r <input\_file.fasta>*

353

354 Alignments were visualized using a custom Python script and "snipit" tool  
355 (<https://github.com/aineniamh/snipit>; last accessed 2022-05-20). Pairwise distances

356 were calculated using pairsnp.py (<https://github.com/gtonkinhill/pairsnp/>; last accessed  
357 2022-05-20) using the command:

358

```
359     pairsnp -f <input_file.fasta> --csv --output <output_file.fasta>
```

360

361 Phylogenetic relationships between all recovered genomes and between viruses  
362 classified under the same VOC were obtained through the inference of maximum  
363 likelihood (ML) trees performed with the program IQTREE v2.1.3 with a general time  
364 reversible (GTR) substitution model using the command:

365

```
366     iqtree -s <input_alignment.fasta> -nt <no_of_cores> -m GTR
```

367

368 We included contemporaneous genomes from the six coastal Kenya counties  
369 (Mombasa, Kilifi, Kwale, Taita Taveta, Tana River, and Lamu) that were sequenced as  
370 part of the national SARS-CoV-2 genomic surveillance to provide phylogenetic context  
371 to the household study genomes. Each ML tree was subsequently time-calibrated using  
372 the program TreeTime, assuming a constant evolutionary rate of SARS-CoV-2 genome  
373 of  $8.0 \times 10^{-4}$  using the command:

374

```
375     treetime -tre <tree_file> --aln <alignment_file> --clock-rate 0.00084 --dates  
376     <metadata_file.csv>
```

377

378 The phylogenetic trees were combined with metadata and visualized with the R  
379 package "ggtree" v2.4.2<sup>47</sup>.

380

### 381 *Virus introductions and putative transmissions*

382 The number of independent virus introductions into the households was investigated  
383 using two approaches.

384

385 *i. Pairwise nucleotide substitution.*



386 Here, we compared observed nucleotide differences between pairs of household  
387 genomes with the number of nucleotide mutations expected over the time interval  
388 between the two sampling dates. The pairwise differences between the household study  
389 genomes were computed using the program pairsnp  
390 (<https://github.com/gtonkinhill/pairsnp>; accessed 06-Feb-2023).

391  
392 *ii. Ancestral state reconstruction (ASR)*  
393 ASR approach was used to identify the introduction events into a household and count  
394 the transitions between household members<sup>16</sup>. This was performed along the time-  
395 scaled phylogeny obtained for each VOC. To infer the number of introduction events  
396 into each household, a variable "source" was generated for which the sequences were  
397 assigned the household ID or noted as "non-household". Using the dated phylogeny,  
398 the nucleotide sequence alignment, the "source" metadata file, a migration analysis  
399 was run using TreeTime<sup>48</sup>, using the command:

400  
401 `treetime migration --tre <dated_tree_file> --states <metadata_file.csv> --attributes`  
402 `<source_attribute>`

403  
404 To infer within household transition events, a variable "participant" was generated for  
405 which the sequences were assigned the participant ID or noted as "non-household".  
406 The migration analysis was rerun using the dated phylogeny and transitions between  
407 members of the same households noted using python scripts described in<sup>16,30</sup>.

## 408 **Statistical analysis**

409  
410 Summary statistics were computed for key demographic characteristics including mean,  
411 median, standard deviation as appropriate. Infection prevalence was expressed using  
412 proportions and comparison between groups included appropriate statistical tests (e.g.,  
413 chi-square or Fisher's exact). All statistical analyses were performed in R version 4.0.5.

414

415 **Ethical consideration**

416 The study protocol was reviewed and approved by both the Scientific and Ethics  
417 Research Unit (SERU) at Kenya Medical Research Institute (KEMRI), Nairobi, Kenya  
418 (REF: SERU protocol # 4077) and the University of Warwick, Biomedical and Scientific  
419 Research Ethics Committee, Coventry, United Kingdom (REF: BSREC 150/19-20  
420 AM01). Prior to baseline data and biospecimen collection, written informed consent was  
421 obtained from all participants aged 18 years or older, while for participants aged less  
422 than 18 years consent was obtained from their parents or legal guardians. Assent was  
423 also sought for adolescents (13-17 years of age).

424

425

426 **Data availability**

427 The consensus genome sequences obtained in this study that passed our quality  
428 control filters have been submitted to both GISAID and GenBank database (accession  
429 numbers available in appendix pages of the supplementary material). The raw data files  
430 have been prepared for deposition in Harvard DataVerse. For more detailed information  
431 beyond the metadata used in the paper, there is a process of managed access requiring  
432 submission of a request form for consideration by our Data Governance Committee  
433 ([http://kemri-wellcome.org/about-us/#ChildVerticalTab\\_15](http://kemri-wellcome.org/about-us/#ChildVerticalTab_15)).

434

435 **Code availability**

436 The code for the analyses presented in this manuscript is available from Github using  
437 the link [https://github.com/cnyaigoti/Household\\_study\\_2021-2022](https://github.com/cnyaigoti/Household_study_2021-2022).

438

439 **Acknowledgements**

440 We thank (a) the members of the Kilifi County rapid response team who worked with our  
441 field study team in collecting the samples analysed here; (b) the members of the  
442 COVID-19 KWTRP Testing Team who undertook real-time RT-PCR processing of the  
443 samples received at KWTRP to identify positives (see full list of members below).

444

445 This work was supported by the National Institute for Health and Care Research (NIHR)  
446 (project reference 17/63/82) using UK aid from the UK Government to support global  
447 health research, The UK Foreign, Commonwealth and Development Office and  
448 Wellcome Trust (grant# 220985). Members of COVID-19 Testing Team at KWTRP are  
449 supported by multiple funding sources including UNITAD (BOHEMIA study received by  
450 Dr Marta Maia funded UNITAID), EDCTP (Senior Fellowship and Research and  
451 Innovation Action (RIA) grants received by Dr Francis Ndungu), GAVI (PCIVS grant  
452 received by Prof. Anthony Scott). Dr Simon Dellicour acknowledges support from the  
453 *Fonds National de la Recherche Scientifique* (F.R.S.-FNRS, Belgium; grant  
454 n°F.4515.22), from the Research Foundation - Flanders (*Fonds voor Wetenschappelijk*  
455 *Onderzoek-Vlaanderen*, FWO, Belgium; grant n°G098321N), and from the European  
456 Union Horizon 2020 project MOOD (grant agreement n°874850). MP and MC were  
457 supported by the Wellcome Trust and FCDO - Wellcome Epidemic Preparedness –  
458 Coronavirus (AFRICO19, grant agreement number 220977/Z/20/Z). The views  
459 expressed in this publication are those of the author (s) and not necessarily those of  
460 NIHR, the Department of Health and Social Care, Foreign Commonwealth and  
461 Development Office, Wellcome Trust or the UK government.

462

#### 463 **List of members of the COVID-19 Testing Team at KWTRP**

464 Agnes Mutiso, Alfred Mwanzu, Angela Karani, Bonface M. Gichuki, Boniface Kaaria,  
465 Brian Bartilol, Brian Tawa, Calleb Odundo, Caroline Ngetsa, Clement Lewa, Daisy  
466 Mugo, David Amadi, David Ileri, Debra Riako, Domtila Kimani, Donwilliams Omuoyo,  
467 Edwin Machanja, Elijah Gicheru, Elisha Omer, Faith Gambo, Horace Gumba, Isaac  
468 Musungu, James Chemweno, Janet Thoya, Jedida Mwacharo, Jennifer Musyoki, John  
469 Gitonga, Johnstone Makale, Justine Getonto, Kelly Ominde, Kelvias Keter, Lydia  
470 Nyamako, Margaret Nunah, Martin Mutunga, Metrine Tendwa, Moses Mosobo, Nelson  
471 Ouma, Nicole Achieng, Patience Kiyuka, Perpetual Wanjiku, Peter Mwaura, Rita Warui,  
472 Robinson Cheruiyot, Salim Mwarumba, Shaban Mwangi, Shadrack Mutua, Susan  
473 Njuguna, Victor Osoi, Wesley Cheruiyot, Wilfred Nyamu, Wilson Gumbi and Yiakon  
474 Sein.

475

476

477 **Role of funding source**

478 The funders of the study had no role in study design, data collection, data analysis ,  
479 data interpretation or writing of the report.

480

481 **Author's contributions**

482 The project was conceived and designed by CNA, KEG, JUN, MC, and DJN; Laboratory  
483 processing of specimens was conducted by JUN, LIO, NM, AWL, KSM, LN, JMM,  
484 MWM, EMO, and TOM; Management and analysis of data were handled by AWL, CNA,  
485 NM, SD and GG. CNA wrote the first draft; MP, MC, LIO, SD, PB, and DJN critically  
486 reviewed the manuscript to produce the final draft.

487

## 488 References

- 489 1 Lee, E. C., Wada, N. I., Grabowski, M. K., Gurley, E. S. & Lessler, J. The engines of SARS-CoV-2  
490 spread. *Science* **370**, 406-407 (2020). <https://doi.org/doi:10.1126/science.abd8755>
- 491 2 Park, Y. J. *et al.* Contact Tracing during Coronavirus Disease Outbreak, South Korea, 2020.  
492 *Emerging Infectious Disease journal* **26**, 2465 (2020). <https://doi.org:10.3201/eid2610.201315>
- 493 3 Thompson, H. A. *et al.* Severe Acute Respiratory Syndrome Coronavirus 2 (SARS-CoV-2) Setting-  
494 specific Transmission Rates: A Systematic Review and Meta-analysis. *Clin Infect Dis* **73**, e754-  
495 e764 (2021). <https://doi.org:10.1093/cid/ciab100>
- 496 4 Kolodziej, L. M. *et al.* High SARS-CoV-2 household transmission rates detected by dense saliva  
497 sampling. *Clinical Infectious Diseases* (2022). <https://doi.org:10.1093/cid/ciac261>
- 498 5 Madewell, Z. J., Yang, Y., Longini, I. M., Jr, Halloran, M. E. & Dean, N. E. Household Secondary  
499 Attack Rates of SARS-CoV-2 by Variant and Vaccination Status: An Updated Systematic Review  
500 and Meta-analysis. *JAMA Network Open* **5**, e229317-e229317 (2022).  
501 <https://doi.org:10.1001/jamanetworkopen.2022.9317>
- 502 6 Jørgensen, S. B., Nygård, K., Kacelnik, O. & Telle, K. Secondary Attack Rates for Omicron and  
503 Delta Variants of SARS-CoV-2 in Norwegian Households. *JAMA* **327**, 1610-1611 (2022).  
504 <https://doi.org:10.1001/jama.2022.3780>
- 505 7 Tegally, H. *et al.* The evolving SARS-CoV-2 epidemic in Africa: Insights from rapidly expanding  
506 genomic surveillance. *Science*, eabq5358 (2022). <https://doi.org:10.1126/science.abq5358>
- 507 8 Hale, T. *et al.* A global panel database of pandemic policies (Oxford COVID-19 Government  
508 Response Tracker). *Nat Hum Behav* **5**, 529-538 (2021). <https://doi.org:10.1038/s41562-021-01079-8>
- 509 9 Nasimiyu, C. *et al.* Imported SARS-CoV-2 Variants of Concern Drove Spread of Infections across  
510 Kenya during the Second Year of the Pandemic. *COVID* **2**, 586-598 (2022).
- 511 10 Nyagwange, J. *et al.* Epidemiology of COVID-19 infections on routine polymerase chain reaction  
512 (PCR) and serology testing in Coastal Kenya. *Wellcome Open Res* **7**, 69 (2022).  
513 <https://doi.org:10.12688/wellcomeopenres.17661.1>
- 514 11 Uyoga, S. *et al.* Prevalence of SARS-CoV-2 Antibodies From a National Serosurveillance of  
515 Kenyan Blood Donors, January-March 2021. *Jama* **326**, 1436-1438 (2021).  
516 <https://doi.org:10.1001/jama.2021.15265>
- 517 12 Otiende, M. *et al.* Impact of COVID-19 on mortality in coastal Kenya: a longitudinal open cohort  
518 study. *medRxiv*, 2022.2010.2012.22281019 (2022).  
519 <https://doi.org:10.1101/2022.10.12.22281019>
- 520 13 Li, J., Lai, S., Gao, G. F. & Shi, W. The emergence, genomic diversity and global spread of SARS-  
521 CoV-2. *Nature* **600**, 408-418 (2021). <https://doi.org:10.1038/s41586-021-04188-6>
- 522 14 Bugembe, D. L. *et al.* Main Routes of Entry and Genomic Diversity of SARS-CoV-2, Uganda.  
523 *Emerg Infect Dis* **26**, 2411-2415 (2020). <https://doi.org:10.3201/eid2610.202575>
- 524 15 Githinji, G. *et al.* Tracking the introduction and spread of SARS-CoV-2 in coastal Kenya. *Nat*  
525 *Commun* **12**, 4809 (2021). <https://doi.org:10.1038/s41467-021-25137-x>
- 526 16 Wilkinson, E. *et al.* A year of genomic surveillance reveals how the SARS-CoV-2 pandemic  
527 unfolded in Africa. *Science* **374**, 423-431 (2021). <https://doi.org:10.1126/science.abj4336>
- 528 17 Vöhringer, H. S. *et al.* Genomic reconstruction of the SARS-CoV-2 epidemic in England. *Nature*  
529 **600**, 506-511 (2021). <https://doi.org:10.1038/s41586-021-04069-y>
- 530 18 Ellingford, J. M. *et al.* Genomic and healthcare dynamics of nosocomial SARS-CoV-2  
531 transmission. *Elife* **10** (2021). <https://doi.org:10.7554/eLife.65453>
- 532 19 Illingworth, C. J. *et al.* Superspreaders drive the largest outbreaks of hospital onset COVID-19  
533 infections. *Elife* **10** (2021). <https://doi.org:10.7554/eLife.67308>
- 534

- 535 20 Hershov, R. B. *et al.* Rapid Spread of SARS-CoV-2 in a State Prison After Introduction by Newly  
536 Transferred Incarcerated Persons - Wisconsin, August 14-October 22, 2020. *MMWR Morb*  
537 *Mortal Wkly Rep* **70**, 478-482 (2021). [https://doi.org:10.15585/mmwr.mm7013a4](https://doi.org/10.15585/mmwr.mm7013a4)  
538 21 Hoshino, K. *et al.* Transmission dynamics of SARS-CoV-2 on the Diamond Princess uncovered  
539 using viral genome sequence analysis. *Gene* **779**, 145496 (2021).  
540 [https://doi.org:10.1016/j.gene.2021.145496](https://doi.org/10.1016/j.gene.2021.145496)  
541 22 Aggarwal, D. *et al.* The role of viral genomics in understanding COVID-19 outbreaks in long-term  
542 care facilities. *Lancet Microbe* **3**, e151-e158 (2022). [https://doi.org:10.1016/s2666-](https://doi.org/10.1016/s2666-5247(21)00208-1)  
543 [5247\(21\)00208-1](https://doi.org/10.1016/s2666-5247(21)00208-1)  
544 23 Baumgarte, S. *et al.* Investigation of a Limited but Explosive COVID-19 Outbreak in a German  
545 Secondary School. *Viruses* **14** (2022). [https://doi.org:10.3390/v14010087](https://doi.org/10.3390/v14010087)  
546 24 Popa, A. *et al.* Genomic epidemiology of superspreading events in Austria reveals mutational  
547 dynamics and transmission properties of SARS-CoV-2. *Sci Transl Med* **12** (2020).  
548 [https://doi.org:10.1126/scitranslmed.abe2555](https://doi.org/10.1126/scitranslmed.abe2555)  
549 25 Smith, E. C., Blanc, H., Surdel, M. C., Vignuzzi, M. & Denison, M. R. Coronaviruses lacking  
550 exoribonuclease activity are susceptible to lethal mutagenesis: evidence for proofreading and  
551 potential therapeutics. *PLoS Pathog* **9**, e1003565 (2013).  
552 [https://doi.org:10.1371/journal.ppat.1003565](https://doi.org/10.1371/journal.ppat.1003565)  
553 26 Nie, Q. *et al.* Phylogenetic and phylodynamic analyses of SARS-CoV-2. *Virus Res* **287**, 198098  
554 (2020). [https://doi.org:10.1016/j.virusres.2020.198098](https://doi.org/10.1016/j.virusres.2020.198098)  
555 27 Hare, D. *et al.* Genomic epidemiological analysis of SARS-CoV-2 household transmission. *Access*  
556 *Microbiol* **3**, 000252 (2021). [https://doi.org:10.1099/acmi.0.000252](https://doi.org/10.1099/acmi.0.000252)  
557 28 Githinji, G. *et al.* The genomic epidemiology of SARS-CoV-2 variants of concern in Kenya.  
558 *medRxiv*, 2022.2010.2026.22281446 (2022). [https://doi.org:10.1101/2022.10.26.22281446](https://doi.org/10.1101/2022.10.26.22281446)  
559 29 Duchene, S. *et al.* Temporal signal and the phylodynamic threshold of SARS-CoV-2. *Virus*  
560 *Evolution* **6** (2020). [https://doi.org:10.1093/ve/veaa061](https://doi.org/10.1093/ve/veaa061)  
561 30 Tegally, H. *et al.* Sixteen novel lineages of SARS-CoV-2 in South Africa. *Nat Med* **27**, 440-446  
562 (2021). [https://doi.org:10.1038/s41591-021-01255-3](https://doi.org/10.1038/s41591-021-01255-3)  
563 31 Munywoki, P. K. *et al.* The source of respiratory syncytial virus infection in infants: a household  
564 cohort study in rural Kenya. *J Infect Dis* **209**, 1685-1692 (2014).  
565 [https://doi.org:10.1093/infdis/jit828](https://doi.org/10.1093/infdis/jit828)  
566 32 Agoti, C. N. *et al.* Transmission networks of SARS-CoV-2 in Coastal Kenya during the first two  
567 waves: a retrospective genomic study. *eLife* **11**, e71703 (2022).  
568 [https://doi.org:10.7554/eLife.71703](https://doi.org/10.7554/eLife.71703)  
569 33 Gomaa, M. R. *et al.* Incidence, household transmission, and neutralizing antibody  
570 seroprevalence of Coronavirus Disease 2019 in Egypt: Results of a community-based cohort.  
571 *PLoS Pathog* **17**, e1009413 (2021). [https://doi.org:10.1371/journal.ppat.1009413](https://doi.org/10.1371/journal.ppat.1009413)  
572 34 Cohen, C. *et al.* SARS-CoV-2 incidence, transmission, and reinfection in a rural and an urban  
573 setting: results of the PHIRST-C cohort study, South Africa, 2020-21. *Lancet Infect Dis* (2022).  
574 [https://doi.org:10.1016/s1473-3099\(22\)00069-x](https://doi.org/10.1016/s1473-3099(22)00069-x)  
575 35 Semakula, M. *et al.* The secondary transmission pattern of COVID-19 based on contact tracing in  
576 Rwanda. *BMJ Global Health* **6**, e004885 (2021). [https://doi.org:10.1136/bmjgh-2020-004885](https://doi.org/10.1136/bmjgh-2020-004885)  
577 36 Ratovoson, R. *et al.* Household transmission of COVID-19 among the earliest cases in  
578 Antananarivo, Madagascar. *Influenza Other Respir Viruses* **16**, 48-55 (2022).  
579 [https://doi.org:10.1111/irv.12896](https://doi.org/10.1111/irv.12896)  
580 37 Herman-Roloff, A. *et al.* Adapting Longstanding Public Health Collaborations between  
581 Government of Kenya and CDC Kenya in Response to the COVID-19 Pandemic, 2020-2021.  
582 *Emerg Infect Dis* **28**, S159-s167 (2022). [https://doi.org:10.3201/eid2813.211550](https://doi.org/10.3201/eid2813.211550)

- 583 38 Orangi, S. *et al.* Epidemiological impact and cost-effectiveness analysis of COVID-19 vaccination  
584 in Kenya. *BMJ Glob Health* **7** (2022). <https://doi.org/10.1136/bmjgh-2022-009430>
- 585 39 Bendall, E. E. *et al.* SARS-CoV-2 Genomic Diversity in Households Highlights the Challenges of  
586 Sequence-Based Transmission Inference. *mSphere* **7**, e00400-00422 (2022).  
587 <https://doi.org/doi:10.1128/msphere.00400-22>
- 588 40 Agoti, C. N. *et al.* Genomic analysis of respiratory syncytial virus infections in households and  
589 utility in inferring who infects the infant. *Sci Rep* **9**, 10076 (2019).  
590 <https://doi.org/10.1038/s41598-019-46509-w>
- 591 41 Gallego-García, P. *et al.* Limited genomic reconstruction of SARS-CoV-2 transmission history  
592 within local epidemiological clusters. *Virus Evolution* **8** (2022).  
593 <https://doi.org/10.1093/ve/veac008>
- 594 42 Scott, J. A. *et al.* Profile: The Kilifi Health and Demographic Surveillance System (KHDSS). *Int J*  
595 *Epidemiol* **41**, 650-657 (2012). <https://doi.org/dys062> [pii]  
596 10.1093/ije/dys062
- 597 43 Tyson, J. R. *et al.* Improvements to the ARTIC multiplex PCR method for SARS-CoV-2 genome  
598 sequencing using nanopore. *bioRxiv* (2020). <https://doi.org/10.1101/2020.09.04.283077>
- 599 44 O'Toole, Á. *et al.* Assignment of epidemiological lineages in an emerging pandemic using the  
600 pangolin tool. *Virus Evol* **7**, veab064 (2021). <https://doi.org/10.1093/ve/veab064>
- 601 45 Rambaut, A. *et al.* A dynamic nomenclature proposal for SARS-CoV-2 lineages to assist genomic  
602 epidemiology. *Nat Microbiol* **5**, 1403-1407 (2020). <https://doi.org/10.1038/s41564-020-0770-5>
- 603 46 Hadfield, J. *et al.* Nextstrain: real-time tracking of pathogen evolution. *Bioinformatics* **34**, 4121-  
604 4123 (2018). <https://doi.org/10.1093/bioinformatics/bty407>
- 605 47 Yu, G., Smith, D. K., Zhu, H., Guan, Y. & Lam, T. T.-Y. ggtree: an r package for visualization and  
606 annotation of phylogenetic trees with their covariates and other associated data. *Methods in*  
607 *Ecology and Evolution* **8**, 28-36 (2017). [https://doi.org:https://doi.org/10.1111/2041-  
608 210X.12628](https://doi.org/https://doi.org/10.1111/2041-210X.12628)
- 609 48 Sagulenko, P., Puller, V. & Neher, R. A. TreeTime: Maximum-likelihood phylodynamic analysis.  
610 *Virus Evol* **4**, vex042 (2018). <https://doi.org/10.1093/ve/vex042>
- 611
