# Supplementary material for: Genomic epidemiology of SARS-CoV-2 within households in coastal Kenya: a case ascertained cohort study
Source: bioRxiv or medRxiv preprint supplement (doi:10.1101/2022.10.26.22281455), 2023-02-19
Supplement: Supplementary file [file media-1.pdf]

## Supplementary information

### Authors

Charles N. Agoti<sup>1,2, #</sup>, Katherine E. Gallagher<sup>1,3</sup>, Joyce Nyiro<sup>1</sup>, Arnold W. Lambisia<sup>1</sup>, Nickson Murunga<sup>1</sup>, Khadija Said Mohammed<sup>1</sup>, Leonard Ndwiga<sup>1</sup>, John M. Morobe<sup>1</sup>, Maureen W. Mburu<sup>1</sup>, Edidah M. Ongera<sup>1</sup>, Timothy Makori<sup>1</sup>, My Phan<sup>4,5</sup>, Matthew Cotten<sup>4,5</sup>, Lynette Isabella Ochola-Oyier<sup>1</sup>, Simon Dellicour<sup>6,7</sup>, Philip Bejon<sup>1,8</sup>, George Githinji<sup>1,2</sup>, and D. James Nokes<sup>1,9</sup>.

### Affiliations

<sup>1</sup>Kenya Medical Research Institute (KEMRI)-Wellcome Trust Research Programme (KWTRP), Kilifi, Kenya.

<sup>2</sup>Pwani University, Kilifi, Kenya.

<sup>3</sup>London School of Hygiene & Tropical Medicine, United Kingdom.

<sup>4</sup>Medical Research Centre (MRC)/ Uganda Virus Research Institute, Entebbe, Uganda

<sup>5</sup>MRC-University of Glasgow, Centre for Virus Research Glasgow, United Kingdom.

<sup>6</sup>Spatial Epidemiology Lab (SpELL), Université Libre de Bruxelles, Bruxelles, Belgium.

<sup>7</sup>Department of Microbiology, Immunology and Transplantation, Rega Institute, Laboratory for Clinical and Epidemiological Virology, KU Leuven, University of Leuven, Leuven, Belgium.

<sup>8</sup>Nuffield Department of Medicine, University of Oxford, Oxford, United Kingdom.

<sup>9</sup>School of Life Sciences and Zeeman Institute for Systems Biology and Infectious Disease Epidemiology Research (SBIDER), University of Warwick, Coventry, United Kingdom.

**S1 Table. Demographic characteristics of study participants.**

| <b>Characteristic</b>           | <b>Positive</b>  | <b>Negative</b>  | <b>Total</b>     | <b>p value</b> |
|---------------------------------|------------------|------------------|------------------|----------------|
| <b>Recruited households</b>     | 80               | 78               | 158              |                |
| <b>Recruited participants</b>   | 171              | 402              | 573              |                |
| <b>Sex</b>                      |                  |                  |                  | 0.383          |
| <b>female (%)</b>               | 104 (60.8)       | 227 (56.5)       | 331(57.8)        |                |
| <b>male (%)</b>                 | 67 (39.2)        | 175 (43.5)       | 242 (42.2)       |                |
| <b>Age distribution (years)</b> |                  |                  |                  |                |
| <b>Median (IQR)</b>             | 27.0 (13.0-46.0) | 19.0 (10.0-41.0) | 24.0 (11.0-44.0) |                |
| <b>Age categories</b>           |                  |                  |                  | 0.109          |
| <b>0-4 y (%)</b>                | 17 (9.8)         | 40 (10.0)        | 57 (9.9)         |                |
| <b>5-9 y (%)</b>                | 15 (8.8)         | 42 (10.4)        | 57 (9.9)         |                |
| <b>10-19 y (%)</b>              | 33 (19.3)        | 109 (27.1)       | 142 (24.8)       |                |
| <b>20-39 y (%)</b>              | 52 (30.4)        | 113 (18.1)       | 165 (28.8)       |                |
| <b>40-64 y (%)</b>              | 47 (27.5)        | 74 (18.4)        | 121 (21.1)       |                |
| <b>65+ y (%)</b>                | 7 (4.1)          | 24 (6.0)         | 31 (5.4)         |                |
| <b>Symptom status</b>           |                  |                  |                  | <0.001         |
| <b>asymptomatic</b>             | 63 (36.8)        | 311 (77.4)       | 374 (65.3)       |                |
| <b>symptomatic</b>              | 108 (63.2)       | 91 (22.6)        | 199 (34.7)       |                |

IQR: Interquartile Range, y: years

**S2 Table. Lineages identified in the sequenced samples from household study and their frequency at household and participant level**

| <b>Lineage</b>   | <b>Genomes</b> | <b>households</b> | <b>Participants</b> | <b>Lineage history</b>                                                             |
|------------------|----------------|-------------------|---------------------|------------------------------------------------------------------------------------|
| <b>B.1</b>       | 11             | 10                | 11                  | Predominantly detected in Europe early in 2020.                                    |
| <b>B.1.1.7</b>   | 70             | 16                | 33                  | Alpha VOC                                                                          |
| <b>B.1.351</b>   | 22             | 6                 | 10                  | Beta VOC                                                                           |
| <b>B.1.617.2</b> | 16             | 14                | 15                  | Delta VOC                                                                          |
| <b>AY.16</b>     | 5              | 2                 | 3                   | Delta VOC sub-lineage predominantly detected in Kenya and multiple other countries |
| <b>AY.46</b>     | 3              | 1                 | 3                   | Delta VOC sub-lineage predominantly detected in Africa                             |
| <b>AY.116</b>    | 58             | 19                | 35                  | Delta VOC sub-lineage predominantly detected in Africa                             |
| <b>AY.122</b>    | 4              | 2                 | 3                   | Delta VOC sub-lineage predominantly detected in Europe                             |
| <b>BA.1.1</b>    | 14             | 6                 | 8                   | Omicron VOC sub-lineage                                                            |
| <b>BA.1.1.1</b>  | 4              | 2                 | 2                   | Omicron VOC sub-lineage predominantly detected in Europe                           |
| <b>BA.1.9</b>    | 1              | 1                 | 1                   | Omicron VOC sub-lineage predominantly detected in Brazil                           |

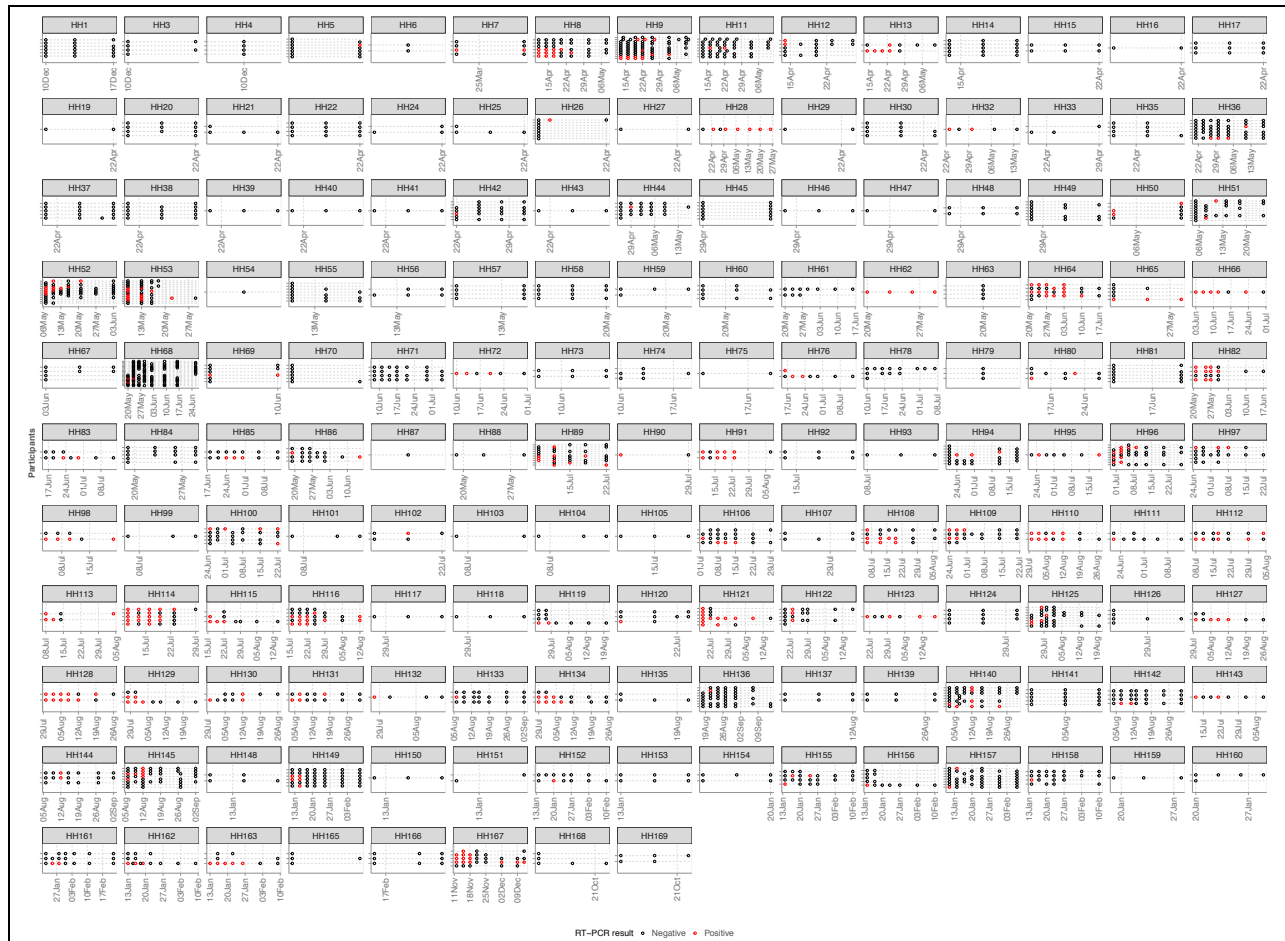

**S1 Figure.** Sampling timelines and participant positivity in enrolled study households: 158 households, 573 participants, 2091 NP/OP swabs. A black circle is SARS-CoV-2 negative NP/OP, a red-circle is SARS-CoV-2 positive NP/OP.

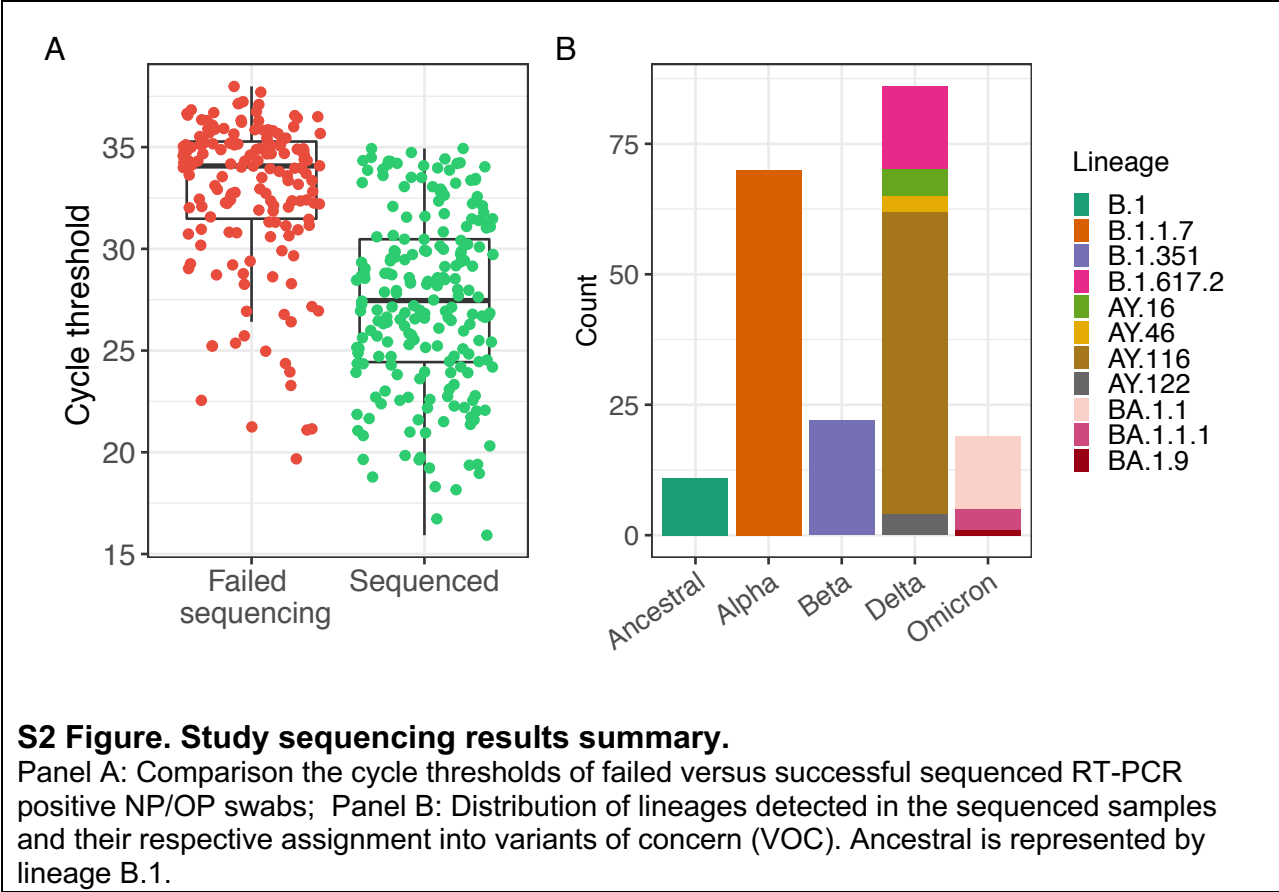

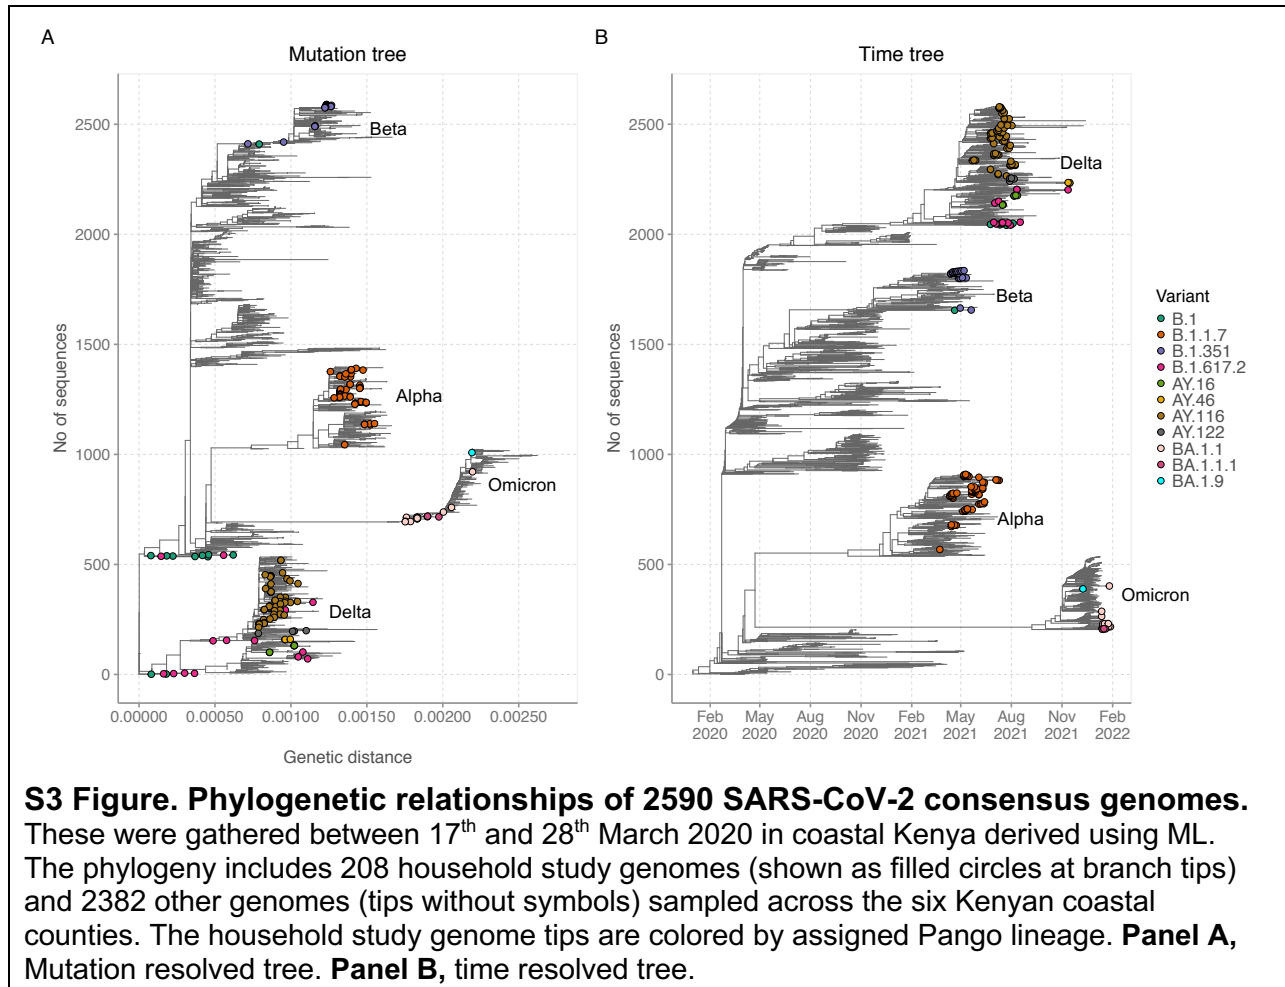

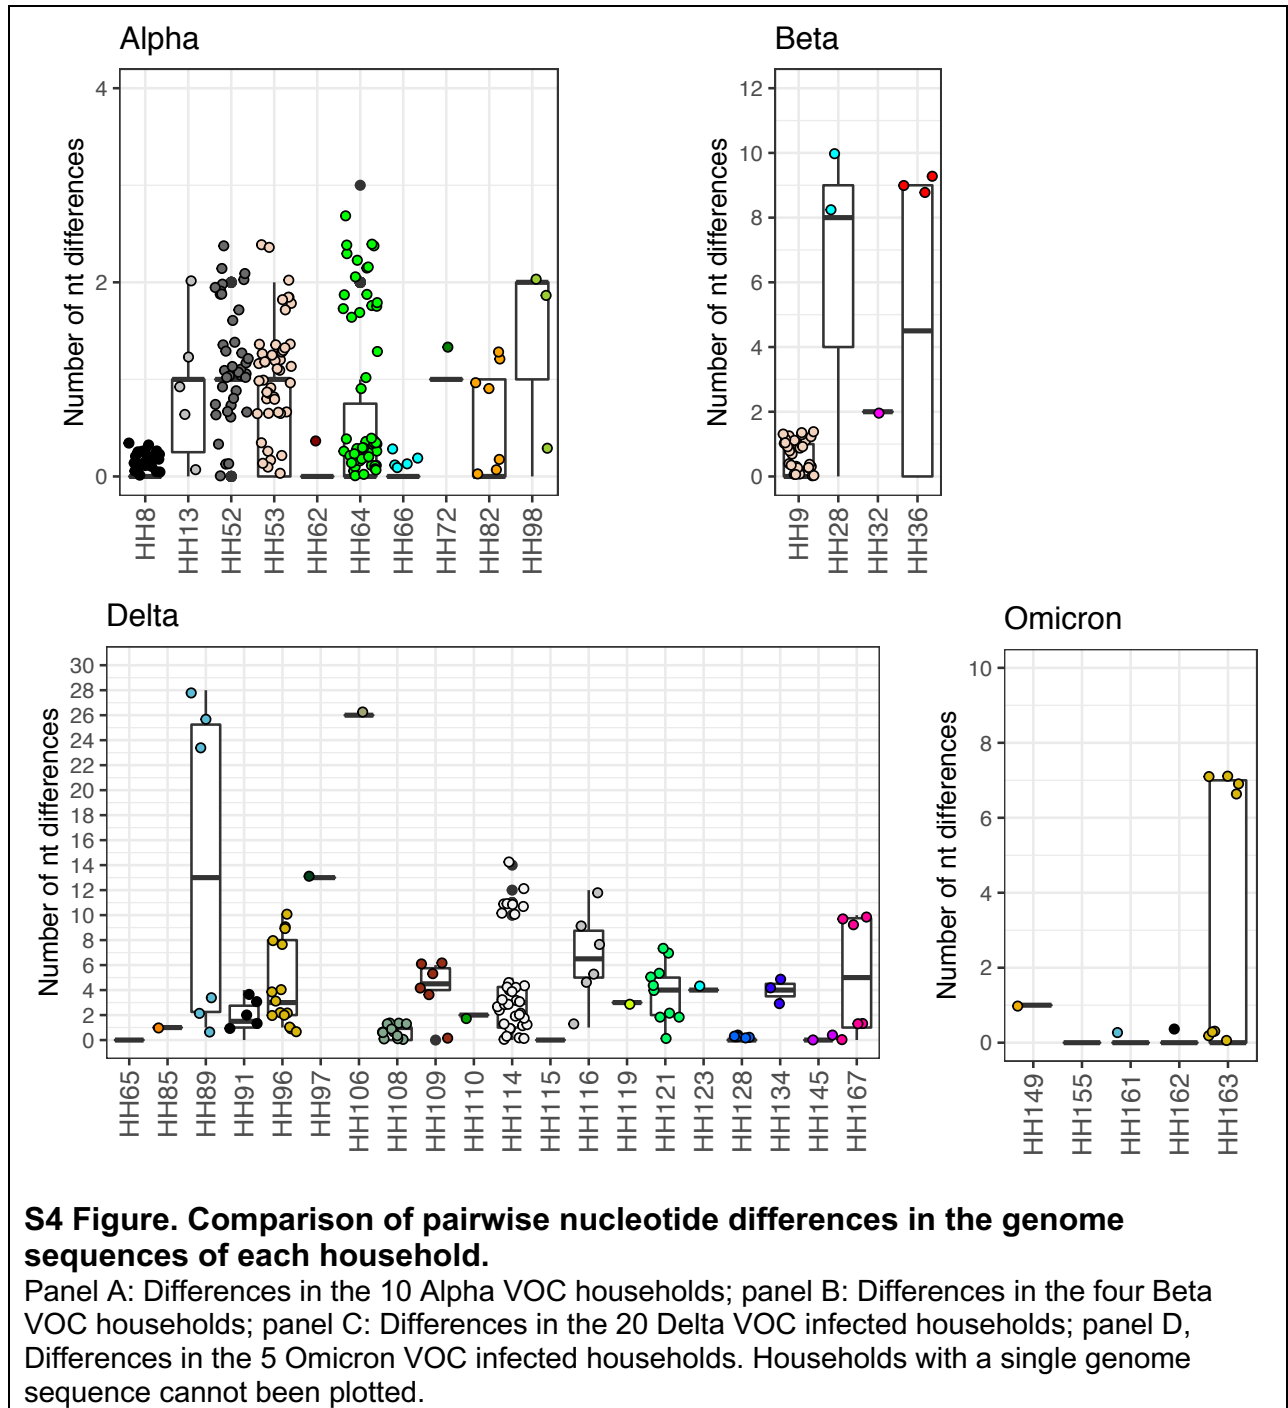

**Appendix: Accession numbers of the sequences from the household study deposited into GISAID databases**

| <b>GISAID Name</b>        | <b>GISAID Accession</b> | <b>HH_ID</b> | <b>Pango Lineage</b> |
|---------------------------|-------------------------|--------------|----------------------|
| hCoV-19/Kenya/C88814/2021 | EPI_ISL_6944234         | HH7          | B.1.1.7              |
| hCoV-19/Kenya/C91180/2021 | EPI_ISL_2602534         | HH8          | B.1.1.7              |
| hCoV-19/Kenya/C91759/2021 | EPI_ISL_2602552         | HH8          | B.1.1.7              |
| hCoV-19/Kenya/C92331/2021 | EPI_ISL_2602577         | HH8          | B.1.1.7              |
| hCoV-19/Kenya/C91760/2021 | EPI_ISL_2602553         | HH8          | B.1.1.7              |
| hCoV-19/Kenya/C91181/2021 | EPI_ISL_2602535         | HH8          | B.1.1.7              |
| hCoV-19/Kenya/C93346/2021 | EPI_ISL_2602602         | HH8          | B.1.1.7              |
| hCoV-19/Kenya/C91761/2021 | EPI_ISL_2602554         | HH8          | B.1.1.7              |
| hCoV-19/Kenya/C91182/2021 | EPI_ISL_2602536         | HH8          | B.1.1.7              |
| hCoV-19/Kenya/C92333/2021 | EPI_ISL_2602578         | HH8          | B.1.1.7              |
| hCoV-19/Kenya/C92271/2021 | EPI_ISL_3150137         | HH9          | B.1.351              |
| hCoV-19/Kenya/C91600/2021 | EPI_ISL_2602546         | HH9          | B.1.351              |
| hCoV-19/Kenya/C91601/2021 | EPI_ISL_2602547         | HH9          | B.1.351              |
| hCoV-19/Kenya/C92272/2021 | EPI_ISL_3150138         | HH9          | B.1.351              |
| hCoV-19/Kenya/C92937/2021 | EPI_ISL_2602588         | HH9          | B.1.351              |
| hCoV-19/Kenya/C92585/2021 | EPI_ISL_2602582         | HH9          | B.1.351              |
| hCoV-19/Kenya/C94719/2021 | EPI_ISL_7237336         | HH9          | B.1.351              |
| hCoV-19/Kenya/C93639/2021 | EPI_ISL_2602615         | HH9          | B.1.351              |
| hCoV-19/Kenya/C93186/2021 | EPI_ISL_2602594         | HH9          | B.1.351              |
| hCoV-19/Kenya/C92733/2021 | EPI_ISL_7237332         | HH9          | B.1                  |
| hCoV-19/Kenya/C93763/2021 | EPI_ISL_2602616         | HH9          | B.1.351              |
| hCoV-19/Kenya/C92283/2021 | EPI_ISL_3150139         | HH11         | B.1.1.7              |
| hCoV-19/Kenya/C91774/2021 | EPI_ISL_2602555         | HH12         | B.1.1.7              |
| hCoV-19/Kenya/C92336/2021 | EPI_ISL_2602579         | HH13         | B.1.1.7              |
| hCoV-19/Kenya/C91765/2021 | EPI_ISL_2602570         | HH13         | B.1.1.7              |
| hCoV-19/Kenya/C93179/2021 | EPI_ISL_6944188         | HH13         | B.1.1.7              |
| hCoV-19/Kenya/C92757/2021 | EPI_ISL_2602583         | HH13         | B.1.1.7              |
| hCoV-19/Kenya/C92339/2021 | EPI_ISL_2602580         | HH26         | B.1.351              |
| hCoV-19/Kenya/C94433/2021 | EPI_ISL_2602632         | HH28         | B.1.351              |
| hCoV-19/Kenya/C93185/2021 | EPI_ISL_2602593         | HH28         | B.1.351              |
| hCoV-19/Kenya/C95523/2021 | EPI_ISL_3150140         | HH28         | B.1.351              |
| hCoV-19/Kenya/C94432/2021 | EPI_ISL_2602631         | HH32         | B.1.351              |
| hCoV-19/Kenya/C93178/2021 | EPI_ISL_2602612         | HH32         | B.1.351              |
| hCoV-19/Kenya/C93778/2021 | EPI_ISL_2602603         | HH36         | B.1.351              |
| hCoV-19/Kenya/C94434/2021 | EPI_ISL_2602633         | HH36         | B.1.351              |
| hCoV-19/Kenya/C94773/2021 | EPI_ISL_6944125         | HH36         | B.1.351              |
| hCoV-19/Kenya/C95899/2021 | EPI_ISL_2602678         | HH36         | B.1.351              |
| hCoV-19/Kenya/C95162/2021 | EPI_ISL_2602641         | HH50         | B.1.1.7              |
| hCoV-19/Kenya/C95530/2021 | EPI_ISL_3150141         | HH52         | B.1.1.7              |
| hCoV-19/Kenya/C95531/2021 | EPI_ISL_3150142         | HH52         | B.1.1.7              |
| hCoV-19/Kenya/C95837/2021 | EPI_ISL_2602674         | HH52         | B.1.1.7              |
| hCoV-19/Kenya/C95532/2021 | EPI_ISL_3150143         | HH52         | B.1.1.7              |
| hCoV-19/Kenya/C95838/2021 | EPI_ISL_2602675         | HH52         | B.1.1.7              |
| hCoV-19/Kenya/C95533/2021 | EPI_ISL_2602669         | HH52         | B.1.1.7              |
| hCoV-19/Kenya/C96392/2021 | EPI_ISL_3150148         | HH52         | B.1.1.7              |
| hCoV-19/Kenya/C95534/2021 | EPI_ISL_3150144         | HH52         | B.1.1.7              |
| hCoV-19/Kenya/C96568/2021 | EPI_ISL_2602701         | HH52         | B.1.1.7              |
| hCoV-19/Kenya/C95839/2021 | EPI_ISL_2602676         | HH52         | B.1.1.7              |
| hCoV-19/Kenya/C95564/2021 | EPI_ISL_6944206         | HH53         | B.1.1.7              |
| hCoV-19/Kenya/C97616/2021 | EPI_ISL_5797402         | HH53         | B.1.1.7              |
| hCoV-19/Kenya/C96381/2021 | EPI_ISL_3150145         | HH53         | B.1.1.7              |
| hCoV-19/Kenya/C95565/2021 | EPI_ISL_2602670         | HH53         | B.1.1.7              |
| hCoV-19/Kenya/C95566/2021 | EPI_ISL_2602671         | HH53         | B.1.1.7              |
| hCoV-19/Kenya/C96388/2021 | EPI_ISL_3150147         | HH53         | B.1.1.7              |
| hCoV-19/Kenya/C95567/2021 | EPI_ISL_2602672         | HH53         | B.1.1.7              |
| hCoV-19/Kenya/C96386/2021 | EPI_ISL_3150146         | HH53         | B.1.1.7              |
| hCoV-19/Kenya/C95569/2021 | EPI_ISL_2602722         | HH53         | B.1.1.7              |



|                            |                 |       |           |
|----------------------------|-----------------|-------|-----------|
| hCoV-19/Kenya/C95570/2021  | EPI_ISL_2602723 | HH53  | B.1.1.7   |
| hCoV-19/Kenya/C95571/2021  | EPI_ISL_2602724 | HH53  | B.1.1.7   |
| hCoV-19/Kenya/C98175/2021  | EPI_ISL_2602742 | HH62  | B.1.1.7   |
| hCoV-19/Kenya/C97303/2021  | EPI_ISL_2602721 | HH62  | B.1.1.7   |
| hCoV-19/Kenya/C98887/2021  | EPI_ISL_5797413 | HH64  | B.1.1.7   |
| hCoV-19/Kenya/C99753/2021  | EPI_ISL_3049440 | HH64  | B.1.1.7   |
| hCoV-19/Kenya/C98636/2021  | EPI_ISL_5797411 | HH64  | B.1.1.7   |
| hCoV-19/Kenya/C98223/2021  | EPI_ISL_2602746 | HH64  | B.1.1.7   |
| hCoV-19/Kenya/C97554/2021  | EPI_ISL_2602732 | HH64  | B.1.1.7   |
| hCoV-19/Kenya/C97866/2021  | EPI_ISL_2602737 | HH64  | B.1.1.7   |
| hCoV-19/Kenya/C98222/2021  | EPI_ISL_2602745 | HH64  | B.1.1.7   |
| hCoV-19/Kenya/C98886/2021  | EPI_ISL_7237388 | HH64  | B.1.1.7   |
| hCoV-19/Kenya/C98888/2021  | EPI_ISL_6709405 | HH64  | B.1.1.7   |
| hCoV-19/Kenya/C98635/2021  | EPI_ISL_7237375 | HH64  | B.1.1.7   |
| hCoV-19/Kenya/C98225/2021  | EPI_ISL_2602747 | HH64  | B.1.1.7   |
| hCoV-19/Kenya/C97868/2021  | EPI_ISL_2602738 | HH64  | B.1.1.7   |
| hCoV-19/Kenya/C97556/2021  | EPI_ISL_5797400 | HH64  | B.1.1.7   |
| hCoV-19/Kenya/C97622/2021  | EPI_ISL_2602734 | HH65  | AY.116    |
| hCoV-19/Kenya/C97982/2021  | EPI_ISL_2602739 | HH65  | AY.116    |
| hCoV-19/Kenya/C98497/2021  | EPI_ISL_2602748 | HH65  | AY.116    |
| hCoV-19/Kenya/C99301/2021  | EPI_ISL_3049427 | HH66  | B.1.1.7   |
| hCoV-19/Kenya/C98894/2021  | EPI_ISL_2602762 | HH66  | B.1.1.7   |
| hCoV-19/Kenya/C99665/2021  | EPI_ISL_7237395 | HH66  | B.1.1.7   |
| hCoV-19/Kenya/C100097/2021 | EPI_ISL_3049459 | HH66  | B.1.1.7   |
| hCoV-19/Kenya/C97315/2021  | EPI_ISL_7237367 | HH68  | B.1.351   |
| hCoV-19/Kenya/C99750/2021  | EPI_ISL_7237411 | HH69  | B.1.1.7   |
| hCoV-19/Kenya/C100103/2021 | EPI_ISL_3049460 | HH72  | B.1.1.7   |
| hCoV-19/Kenya/C99755/2021  | EPI_ISL_3049441 | HH72  | B.1.1.7   |
| hCoV-19/Kenya/C100105/2021 | EPI_ISL_3049461 | HH80  | B.1.1.7   |
| hCoV-19/Kenya/C97548/2021  | EPI_ISL_6709497 | HH82  | B.1.1.7   |
| hCoV-19/Kenya/C98229/2021  | EPI_ISL_5797409 | HH82  | B.1.1.7   |
| hCoV-19/Kenya/C97550/2021  | EPI_ISL_2602731 | HH82  | B.1.1.7   |
| hCoV-19/Kenya/C97980/2021  | EPI_ISL_5797404 | HH82  | B.1.1.7   |
| hCoV-19/Kenya/C97551/2021  | EPI_ISL_6709440 | HH82  | B.1.1.7   |
| hCoV-19/Kenya/C101629/2021 | EPI_ISL_3049665 | HH85  | AY.116    |
| hCoV-19/Kenya/C101330/2021 | EPI_ISL_3049550 | HH85  | AY.116    |
| hCoV-19/Kenya/C103808/2021 | EPI_ISL_3150081 | HH89  | AY.116    |
| hCoV-19/Kenya/C104088/2021 | EPI_ISL_7236562 | HH89  | B.1       |
| hCoV-19/Kenya/C103610/2021 | EPI_ISL_3049852 | HH89  | AY.116    |
| hCoV-19/Kenya/C103611/2021 | EPI_ISL_3049833 | HH89  | B.1.617.2 |
| hCoV-19/Kenya/C103612/2021 | EPI_ISL_3049834 | HH89  | AY.116    |
| hCoV-19/Kenya/C105933/2021 | EPI_ISL_7236630 | HH90  | B.1.617.2 |
| hCoV-19/Kenya/C105699/2021 | EPI_ISL_3910032 | HH91  | AY.116    |
| hCoV-19/Kenya/C103640/2021 | EPI_ISL_3150059 | HH91  | AY.116    |
| hCoV-19/Kenya/C104665/2021 | EPI_ISL_7236567 | HH91  | B.1       |
| hCoV-19/Kenya/C104879/2021 | EPI_ISL_6944143 | HH91  | AY.116    |
| hCoV-19/Kenya/C105700/2021 | EPI_ISL_3910035 | HH91  | AY.116    |
| hCoV-19/Kenya/C101329/2021 | EPI_ISL_7236506 | HH94  | B.1       |
| hCoV-19/Kenya/C102007/2021 | EPI_ISL_3049691 | HH94  | AY.116    |
| hCoV-19/Kenya/C103652/2021 | EPI_ISL_7236548 | HH94  | B.1       |
| hCoV-19/Kenya/C101996/2021 | EPI_ISL_7236517 | HH96  | B.1.617.2 |
| hCoV-19/Kenya/C101998/2021 | EPI_ISL_6944187 | HH96  | AY.116    |
| hCoV-19/Kenya/C102000/2021 | EPI_ISL_7236518 | HH96  | AY.116    |
| hCoV-19/Kenya/C102433/2021 | EPI_ISL_3049846 | HH96  | AY.116    |
| hCoV-19/Kenya/C103609/2021 | EPI_ISL_6944136 | HH96  | AY.116    |
| hCoV-19/Kenya/C102883/2021 | EPI_ISL_6944149 | HH96  | AY.116    |
| hCoV-19/Kenya/C103225/2021 | EPI_ISL_3049850 | HH97  | AY.116    |
| hCoV-19/Kenya/C102438/2021 | EPI_ISL_7236525 | HH97  | B.1.617.2 |
| hCoV-19/Kenya/C103638/2021 | EPI_ISL_3150058 | HH98  | B.1.1.7   |
| hCoV-19/Kenya/C102434/2021 | EPI_ISL_3049776 | HH98  | B.1.1.7   |
| hCoV-19/Kenya/C103187/2021 | EPI_ISL_3049826 | HH98  | B.1.1.7   |
| hCoV-19/Kenya/C104095/2021 | EPI_ISL_3150105 | HH100 | AY.116    |

|                            |                  |       |           |
|----------------------------|------------------|-------|-----------|
| hCoV-19/Kenya/C103648/2021 | EPI_ISL_3150064  | HH106 | AY.116    |
| hCoV-19/Kenya/C102387/2021 | EPI_ISL_6944141  | HH106 | B.1.617.2 |
| hCoV-19/Kenya/C103800/2021 | EPI_ISL_3150079  | HH108 | AY.116    |
| hCoV-19/Kenya/C102873/2021 | EPI_ISL_3049797  | HH108 | AY.116    |
| hCoV-19/Kenya/C103801/2021 | EPI_ISL_3150080  | HH108 | AY.116    |
| hCoV-19/Kenya/C102874/2021 | EPI_ISL_3049798  | HH108 | AY.116    |
| hCoV-19/Kenya/C104664/2021 | EPI_ISL_3150127  | HH108 | AY.116    |
| hCoV-19/Kenya/C102872/2021 | EPI_ISL_3049796  | HH108 | AY.116    |
| hCoV-19/Kenya/C101333/2021 | EPI_ISL_3049551  | HH109 | AY.116    |
| hCoV-19/Kenya/C101335/2021 | EPI_ISL_3049552  | HH109 | AY.116    |
| hCoV-19/Kenya/C102004/2021 | EPI_ISL_3049751  | HH109 | AY.116    |
| hCoV-19/Kenya/C101636/2021 | EPI_ISL_3049666  | HH109 | AY.116    |
| hCoV-19/Kenya/C106456/2021 | EPI_ISL_6944239  | HH110 | AY.116    |
| hCoV-19/Kenya/C106338/2021 | EPI_ISL_3909866  | HH110 | AY.116    |
| hCoV-19/Kenya/C103226/2021 | EPI_ISL_3049851  | HH112 | AY.116    |
| hCoV-19/Kenya/C103642/2021 | EPI_ISL_3150060  | HH114 | AY.116    |
| hCoV-19/Kenya/C103643/2021 | EPI_ISL_3150061  | HH114 | AY.116    |
| hCoV-19/Kenya/C104668/2021 | EPI_ISL_7236571  | HH114 | B.1.617.2 |
| hCoV-19/Kenya/C104886/2021 | EPI_ISL_7236600  | HH114 | B.1       |
| hCoV-19/Kenya/C103644/2021 | EPI_ISL_3150062  | HH114 | AY.116    |
| hCoV-19/Kenya/C103848/2021 | EPI_ISL_3150086  | HH114 | AY.116    |
| hCoV-19/Kenya/C103850/2021 | EPI_ISL_6944204  | HH114 | AY.116    |
| hCoV-19/Kenya/C104671/2021 | EPI_ISL_6944140  | HH114 | B.1.617.2 |
| hCoV-19/Kenya/C103646/2021 | EPI_ISL_3150063  | HH114 | AY.116    |
| hCoV-19/Kenya/C104887/2021 | EPI_ISL_6944213  | HH114 | AY.116    |
| hCoV-19/Kenya/C104672/2021 | EPI_ISL_3150128  | HH115 | B.1.617.2 |
| hCoV-19/Kenya/C104673/2021 | EPI_ISL_3150129  | HH115 | AY.16     |
| hCoV-19/Kenya/C104674/2021 | EPI_ISL_3150130  | HH116 | AY.116    |
| hCoV-19/Kenya/C104676/2021 | EPI_ISL_3150131  | HH116 | AY.116    |
| hCoV-19/Kenya/C105216/2021 | EPI_ISL_6709422  | HH116 | B.1.617.2 |
| hCoV-19/Kenya/C104873/2021 | EPI_ISL_6944124  | HH116 | AY.116    |
| hCoV-19/Kenya/C106194/2021 | EPI_ISL_3910162  | HH119 | AY.116    |
| hCoV-19/Kenya/C105748/2021 | EPI_ISL_7236622  | HH119 | AY.116    |
| hCoV-19/Kenya/C104727/2021 | EPI_ISL_7236591  | HH120 | B.1.617.2 |
| hCoV-19/Kenya/C104889/2021 | EPI_ISL_6944123  | HH121 | AY.116    |
| hCoV-19/Kenya/C105765/2021 | EPI_ISL_6944205  | HH121 | AY.116    |
| hCoV-19/Kenya/C106395/2021 | EPI_ISL_7236665  | HH121 | B.1       |
| hCoV-19/Kenya/C106189/2021 | EPI_ISL_3910159  | HH121 | AY.116    |
| hCoV-19/Kenya/C104890/2021 | EPI_ISL_7236611  | HH121 | B.1.617.2 |
| hCoV-19/Kenya/C104892/2021 | EPI_ISL_6944192  | HH121 | AY.116    |
| hCoV-19/Kenya/C105691/2021 | EPI_ISL_7236621  | HH122 | B.1       |
| hCoV-19/Kenya/C107193/2021 | EPI_ISL_7236708  | HH123 | B.1.617.2 |
| hCoV-19/Kenya/C106832/2021 | EPI_ISL_7236700  | HH123 | B.1.617.2 |
| hCoV-19/Kenya/C106324/2021 | EPI_ISL_7236651  | HH127 | B.1.617.2 |
| hCoV-19/Kenya/C106334/2021 | EPI_ISL_3909859  | HH128 | AY.116    |
| hCoV-19/Kenya/C106458/2021 | EPI_ISL_3909896  | HH128 | AY.116    |
| hCoV-19/Kenya/C106697/2021 | EPI_ISL_3909947  | HH128 | AY.116    |
| hCoV-19/Kenya/C106335/2021 | EPI_ISL_3909862  | HH128 | AY.116    |
| hCoV-19/Kenya/C106589/2021 | EPI_ISL_3909920  | HH128 | AY.116    |
| hCoV-19/Kenya/C106459/2021 | EPI_ISL_3909900  | HH128 | AY.116    |
| hCoV-19/Kenya/C106696/2021 | EPI_ISL_3909942  | HH128 | AY.116    |
| hCoV-19/Kenya/C106181/2021 | EPI_ISL_7236638  | HH129 | B.1       |
| hCoV-19/Kenya/C106386/2021 | EPI_ISL_3909872  | HH129 | AY.116    |
| hCoV-19/Kenya/C106630/2021 | EPI_ISL_3909936  | HH133 | AY.122    |
| hCoV-19/Kenya/C106262/2021 | EPI_ISL_3910200  | HH134 | AY.122    |
| hCoV-19/Kenya/C106540/2021 | EPI_ISL_7236687  | HH134 | B.1       |
| hCoV-19/Kenya/C106397/2021 | EPI_ISL_3909875  | HH134 | AY.122    |
| hCoV-19/Kenya/C106263/2021 | EPI_ISL_6944157  | HH134 | AY.122    |
| hCoV-19/Kenya/C106828/2021 | EPI_ISL_7236695  | HH142 | B.1.617.2 |
| hCoV-19/Kenya/C103805/2021 | EPI_ISL_7236554  | HH143 | B.1       |
| hCoV-19/Kenya/C113902/2022 | EPI_ISL_11116830 | HH149 | BA.1.1    |
| hCoV-19/Kenya/C113903/2022 | EPI_ISL_11116831 | HH149 | BA.1.1    |

|                            |                  |       |           |
|----------------------------|------------------|-------|-----------|
| hCoV-19/Kenya/C113981/2022 | EPI_ISL_11116843 | HH155 | BA.1.1    |
| hCoV-19/Kenya/C114051/2022 | EPI_ISL_11116848 | HH155 | BA.1.1    |
| hCoV-19/Kenya/C114287/2022 | EPI_ISL_11116859 | HH155 | BA.1.1    |
| hCoV-19/Kenya/C113966/2022 | EPI_ISL_11116840 | HH156 | BA.1.1.1  |
| hCoV-19/Kenya/C113980/2022 | EPI_ISL_11116842 | HH157 | BA.1.1    |
| hCoV-19/Kenya/C113972/2022 | EPI_ISL_11116841 | HH158 | BA.1.1    |
| hCoV-19/Kenya/C114317/2022 | EPI_ISL_11116862 | HH161 | BA.1.1    |
| hCoV-19/Kenya/C114418/2022 | EPI_ISL_11116864 | HH161 | BA.1.1    |
| hCoV-19/Kenya/C113936/2022 | EPI_ISL_11116838 | HH162 | BA.1.1.1  |
| hCoV-19/Kenya/C114136/2022 | EPI_ISL_11116853 | HH162 | BA.1.1.1  |
| hCoV-19/Kenya/C114017/2022 | EPI_ISL_11116846 | HH162 | BA.1.1.1  |
| hCoV-19/Kenya/C114222/2022 | EPI_ISL_11116857 | HH163 | BA.1.1    |
| hCoV-19/Kenya/C114133/2022 | EPI_ISL_11116852 | HH163 | BA.1.1    |
| hCoV-19/Kenya/C113933/2022 | EPI_ISL_11116837 | HH163 | BA.1.1    |
| hCoV-19/Kenya/C114020/2022 | EPI_ISL_11116847 | HH163 | BA.1.1    |
| hCoV-19/Kenya/C114359/2022 | EPI_ISL_11116863 | HH163 | BA.1.1    |
| hCoV-19/Kenya/C111708/2021 | EPI_ISL_6709504  | HH167 | AY.46     |
| hCoV-19/Kenya/C112904/2021 | EPI_ISL_11116699 | HH167 | BA.1.9    |
| hCoV-19/Kenya/C111861/2021 | EPI_ISL_6944217  | HH167 | AY.46     |
| hCoV-19/Kenya/C111709/2021 | EPI_ISL_6709400  | HH167 | B.1.617.2 |
| hCoV-19/Kenya/C111863/2021 | EPI_ISL_6944218  | HH167 | AY.46     |
